# Supplementary material for: Triazolated calix[4]semitubes: assembling strategies towards long multicalixarene architectures
Source: Royal Society of Chemistry journal article supplement (doi:10.1039/d2qo00432a), 2022-01-01
Supplement: d2qo00432a1.pdf [file d2qo00432a1.pdf]

## Triazolated calix[4]semitubes: assembling strategies towards long multicalixarene architectures

Maria Malakhova, Alexander Gorbunov, Nikolay Ozerov, Ilia Korniltsev, Kirill Ermolov, Stanislav Bezzubov, Vladimir Kovalev and Ivan Vatsouro

### Supplementary Information

#### Contents

|                                                                     |    |
|---------------------------------------------------------------------|----|
| Synthesis and characterization of novel compounds.....              | 2  |
| Tuning the conditions for the preparation of calix[4]semitubes..... | 11 |
| NMR spectra of novel compounds .....                                | 14 |
| Details of X-ray diffraction measurements .....                     | 29 |
| References .....                                                    | 30 |

## Synthesis and characterization of novel compounds

*General experimental methods:* NMR spectra were acquired on Bruker Avance 400 instrument at 20 °C if not stated otherwise, and chemical shifts are reported as ppm referenced to solvent signals. ESI mass spectra were obtained from Sciex TripleTOF 5600+ spectrometers. Chemicals received from commercial sources were used without further purification. Calixarenes **1**,<sup>[S1]</sup> **2**–**4**,<sup>[S2]</sup> **5**,<sup>[S3]</sup> **6**,<sup>[S4]</sup> **7**,<sup>[S5]</sup> **8**,<sup>[S2]</sup> **9**,<sup>[S6]</sup> and **10**<sup>[S7]</sup> were prepared according to the published procedures.

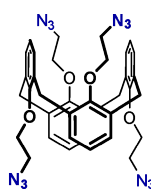

*Tetrakis(azide) 11.* Diisopropyl azodicarboxylate (2.73 ml, 13.87 mmol) was added dropwise at stirring to a cooled (0–5 °C) solution of Ph<sub>3</sub>P (2.73 g, 10.4 mmol) in dry THF (30 ml). After a solid formed, the mixture was stirred at cooling for 1 h. A solution of calix[4]arene **10** (1.04 g, 1.73 mmol) and diphenyl phosphoryl azide (2.99 ml, 13.87 mmol) in THF (90 ml) was added dropwise. The reaction mixture was stirred at cooling for 1 h and then allowed to stay at room temperature for 48 h. The solution was concentrated under reduced pressure and the resultant oil was treated with cold methanol. The solid formed was collected, washed with methanol and dried. Yield 0.627 g (52%), white solid. M.p. 97–99 °C. <sup>1</sup>H NMR (400 MHz, CDCl<sub>3</sub>): δ = 7.08 (d, 8H, <sup>3</sup>J<sub>HH</sub> = 7.6 Hz; ArH), 6.89 (t, 4H, <sup>3</sup>J<sub>HH</sub> = 7.6 Hz; ArH), 3.82 (s, 8H; ArCH<sub>2</sub>Ar), 3.54–3.48 (m, 8H; OCH<sub>2</sub>), 2.97–2.91 (m, 8H; CH<sub>2</sub>N<sub>3</sub>) ppm; <sup>13</sup>C NMR (100 MHz, CDCl<sub>3</sub>): δ = 155.77, 133.70 (C<sub>Ar</sub>), 129.48, 123.10 (CH<sub>Ar</sub>), 68.02 (OCH<sub>2</sub>), 50.13 (CH<sub>2</sub>N<sub>3</sub>), 37.42 (ArCH<sub>2</sub>Ar) ppm. ESI-MS *m/z*: 718.3314 [M+NH<sub>4</sub>]<sup>+</sup> for C<sub>36</sub>H<sub>40</sub>N<sub>13</sub>O<sub>4</sub> (718.3321).

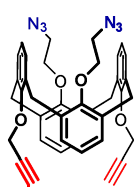

*Bis(azide)/bis(alkyne) 12.* A mixture of bis(azide) **2** (2.81 g, 5.00 mmol) and anhydrous Cs<sub>2</sub>CO<sub>3</sub> (6.52 g, 20.0 mmol) in dry DMF (80 ml) was stirred at room temperature for 2 h. Propargyl bromide (80% in toluene, 2.23 ml, 20.0 mmol) was added and stirring was continued for 48 h at room temperature. The solvent was removed under reduced pressure without heating, and the residue was parted between dichloromethane and 2 M HCl. The organic layer was separated, washed with water, dried with MgSO<sub>4</sub> and concentrated to dryness. The residue was purified by column chromatography (gradient from hexane to hexane/dichloromethane (1:2)). Yield 1.091 g (34%), white solid. M.p. >300 °C. <sup>1</sup>H NMR (400 MHz, CDCl<sub>3</sub>): δ = 7.15 (d, 4H, <sup>3</sup>J<sub>HH</sub> = 7.5 Hz; ArH), 7.08 (d, 4H, <sup>3</sup>J<sub>HH</sub> = 7.5 Hz; ArH), 6.85 (t, 2H, <sup>3</sup>J<sub>HH</sub> = 7.5 Hz; ArH), 6.83 (t, 2H, <sup>3</sup>J<sub>HH</sub> = 7.5 Hz; ArH), 4.01 (d, 4H, <sup>4</sup>J<sub>HH</sub> = 2.4 Hz; OCH<sub>2</sub>CCH), 3.88 (d, 4H, <sup>2</sup>J<sub>HH</sub> = 15.1 Hz; ArCH<sub>2</sub>Ar), 3.70 (d, 4H, <sup>2</sup>J<sub>HH</sub> = 15.1 Hz; ArCH<sub>2</sub>Ar), 3.52–3.47 (m, 4H; OCH<sub>2</sub>), 3.19–3.13 (m, 4H; CH<sub>2</sub>N<sub>3</sub>), 2.39 (t, 2H, <sup>4</sup>J<sub>HH</sub> = 2.4 Hz; CH) ppm; <sup>13</sup>C NMR (100 MHz, CDCl<sub>3</sub>): δ = 155.49, 155.35, 134.52, 133.61

(C<sub>Ar</sub>), 130.41, 129.75, 123.14, 123.08 (CH<sub>Ar</sub>), 80.29 (OCH<sub>2</sub>C), 74.56 (CH), 68.87 (OCH<sub>2</sub>), 58.62 (OCH<sub>2</sub>CCH), 50.62 (CH<sub>2</sub>N<sub>3</sub>), 37.16 (ArCH<sub>2</sub>Ar) ppm. ESI-MS *m/z*: 656.2980 [M+NH<sub>4</sub>]<sup>+</sup> for C<sub>38</sub>H<sub>38</sub>N<sub>7</sub>O<sub>4</sub> (656.2980).

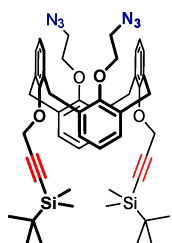

*Bis(azide) 13*. Under argon, *n*BuLi (2.5 M in hexane, 0.442 ml, 1.10 mmol) was added dropwise to a solution of bis(trimethylsilyl)amine (0.308 ml, 1.47 mmol) in dry THF (10 ml) at cooling (−78 °C). The mixture was slowly heated to room temperature, stirred for 1 h, and cooled again (−78 °C). A solution of calixarene **12** (0.235 g, 0.37 mmol) in dry THF (10 ml) was added dropwise with stirring, and the mixture was stirred at cooling for 30 min. A solution of *tert*-butyldimethylsilyl chloride (0.167 g, 1.10 mmol) in dry THF (10 ml) was added, the mixture was heated to room temperature and stirred overnight. Saturated solution of NH<sub>4</sub>Cl (30 ml) was added to the reaction mixture, the organic phase was separated, the aqueous phase was washed with dichloromethane (2×20 ml). The combined organic extracts were washed with water, dried with MgSO<sub>4</sub> and evaporated to dryness. The residue was purified by flash chromatography on SiO<sub>2</sub> (dichloromethane). Yield 0.220 g (69%), white solid. M.p. 103–105 °C. <sup>1</sup>H NMR (400 MHz, CDCl<sub>3</sub>): δ = 7.14 (d, 4H, <sup>3</sup>J<sub>HH</sub> = 7.5 Hz; ArH), 7.04 (d, 4H, <sup>3</sup>J<sub>HH</sub> = 7.5 Hz; ArH), 6.79 (t, 2H, <sup>3</sup>J<sub>HH</sub> = 7.5 Hz; ArH), 6.74 (t, 2H, <sup>3</sup>J<sub>HH</sub> = 7.5 Hz; ArH), 4.21 (s, 4H; OCH<sub>2</sub>CCH), 3.82 (d, 4H, <sup>2</sup>J<sub>HH</sub> = 14.5 Hz; ArCH<sub>2</sub>Ar), 3.62 (d, 4H, <sup>2</sup>J<sub>HH</sub> = 14.5 Hz; ArCH<sub>2</sub>Ar), 3.54–3.48 (m, 4H; OCH<sub>2</sub>), 3.31–3.25 (m, 4H; CH<sub>2</sub>N<sub>3</sub>), 0.93 (s, 18H; C(CH<sub>3</sub>)<sub>3</sub>), 0.12 (s, 12H; SiCH<sub>3</sub>) ppm; <sup>13</sup>C NMR (100 MHz, CDCl<sub>3</sub>): δ = 155.60, 155.26, 134.47, 133.39 (C<sub>Ar</sub>), 130.50, 129.66, 122.93, 122.60 (CH<sub>Ar</sub>), 102.82 (OCH<sub>2</sub>C), 89.83 (OCH<sub>2</sub>C), 69.23 (OCH<sub>2</sub>), 59.48 (OCH<sub>2</sub>CC), 51.00 (CH<sub>2</sub>N<sub>3</sub>), 36.78 (ArCH<sub>2</sub>Ar), 26.03 (C(CH<sub>3</sub>)<sub>3</sub>), 16.47 (C(CH<sub>3</sub>)<sub>3</sub>), −4.75 (SiCH<sub>3</sub>) ppm. ESI-MS *m/z*: 884.4705 [M+NH<sub>4</sub>]<sup>+</sup> for C<sub>50</sub>H<sub>66</sub>N<sub>7</sub>O<sub>4</sub>Si<sub>2</sub> (884.4709).

*General procedure for the preparation of calix[4]semitubes*. To a stirred mixture of calixarene (bis)alkyne and (bis)azide in toluene or THF, Cu(I)-catalyst was added (CuI dissolved in a small portion of toluene by addition of Et<sub>3</sub>N, or CuSO<sub>4</sub>·5H<sub>2</sub>O/sodium ascorbate mixture dissolved in water). The mixture was stirred at room temperature or at heating, and then concentrated under reduced pressure. The residue was parted between dichloromethane and 2 M HCl at vigorous stirring for at least 2 h. The organic layer was separated, washed with aqueous Na<sub>2</sub>SO<sub>3</sub> (5%, for CuI-catalyzed reactions only), water and dried with MgSO<sub>4</sub>. The solvent was removed and the residue was subjected to column chromatography. The two-step column separation was applied in several cases: from the first column, a polymeric material was first eluted followed by a

semitube-containing fraction, which was then evaporated to dryness and subjected to the second column (with the same or different eluent) for the final purification.

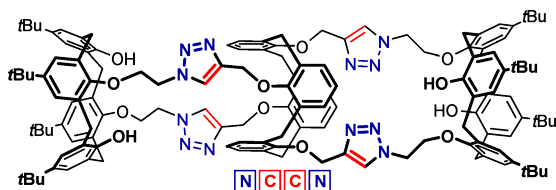

*Tris(calix[4]arene) 14* was prepared according to *General procedure* from calixarene **1** (0.524 g, 0.68 mmol), calixarene **9** (0.195 g, 0.34 mmol), CuI (0.038 g, 0.20 mmol) and Et<sub>3</sub>N (0.56 ml, 4.0 mmol) in toluene (40 ml). The reaction mixture was stirred at room temperature for 48 h. Column: gradient from dichloromethane to dichloromethane/ethanol (50:1). Yield 0.270 g (38%), white solid. M.p. >300 °C. <sup>1</sup>H NMR (400 MHz, CDCl<sub>3</sub>): δ = 7.09 (s, 8H; ArH), 7.05 (s, 4H; OH), 6.77 (s, 8H; ArH), 6.74 (d, 8H, <sup>3</sup>J<sub>HH</sub> = 7.5 Hz; ArH), 6.45 (s, 4H; ArH<sub>Trz</sub>), 6.37 (t, 4H, <sup>3</sup>J<sub>HH</sub> = 7.5 Hz; ArH), 4.98–4.93 (m, 8H; NCH<sub>2</sub>), 4.87 (s, 8H; OCH<sub>2</sub>Trz), 4.40–4.34 (m, 8H; NCH<sub>2</sub>CH<sub>2</sub>), 4.00 (d, 8H, <sup>2</sup>J<sub>HH</sub> = 13.2 Hz; ArCH<sub>2</sub>Ar), 3.60 (s, 8H; ArCH<sub>2</sub>Ar), 3.38 (d, 8H, <sup>2</sup>J<sub>HH</sub> = 13.2 Hz; ArCH<sub>2</sub>Ar), 1.31 (s, 36H; C(CH<sub>3</sub>)<sub>3</sub>), 0.91 (s, 36H; C(CH<sub>3</sub>)<sub>3</sub>) ppm; <sup>13</sup>C NMR (100 MHz, CDCl<sub>3</sub>): δ = 155.63, 149.99, 148.63, 147.80 (C<sub>Ar</sub>), 144.73 (C<sub>Ar</sub> Trz), 142.12, 134.18, 131.92 (C<sub>Ar</sub>), 129.04 (CH<sub>Ar</sub>), 127.23 (C<sub>Ar</sub>), 125.83 (CH<sub>Ar</sub>), 125.38 (CH<sub>Ar</sub> Trz)\*, 125.17, 122.67 (CH<sub>Ar</sub>), 73.57, 63.42 (OCH<sub>2</sub>), 49.18 (NCH<sub>2</sub>), 37.94 (ArCH<sub>2</sub>Ar), 33.90, 33.87 (C(CH<sub>3</sub>)<sub>3</sub>), 31.66 (C(CH<sub>3</sub>)<sub>3</sub>), 31.50 (ArCH<sub>2</sub>Ar), 30.83 (C(CH<sub>3</sub>)<sub>3</sub>) ppm. ESI-MS *m/z*: 1098.0888 [M+2Na]<sup>2+</sup> for C<sub>136</sub>H<sub>156</sub>Na<sub>2</sub>N<sub>12</sub>O<sub>12</sub> (1098.0892); 2151.2055 [M+H]<sup>+</sup> for C<sub>136</sub>H<sub>157</sub>N<sub>12</sub>O<sub>12</sub> (2151.2072).

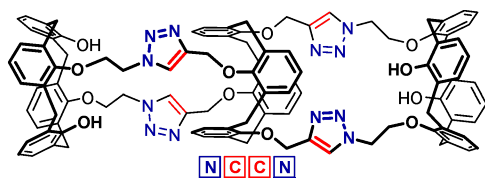

*Tris(calix[4]arene) 15* was prepared according to *General procedure* from calixarene **2** (0.101 g, 0.18 mmol), calixarene **9** (0.052 g, 0.09 mmol), CuI (0.011 g, 0.06 mmol) and Et<sub>3</sub>N (1.0 ml) in toluene (10 ml). The reaction mixture was stirred at room temperature for 24 h. Column: gradient from dichloromethane to dichloromethane/ethanol (50:1). Yield 0.045 g (29%), white solid. M.p. 264–266 °C (decomp.). <sup>1</sup>H NMR (400 MHz, CDCl<sub>3</sub>): δ = 7.11 (d, 8H, <sup>3</sup>J<sub>HH</sub> = 7.5 Hz; ArH), 7.10 (s, 4H; OH), 6.98 (s, 4H; ArH<sub>Trz</sub>), 6.84 (d, 8H, <sup>3</sup>J<sub>HH</sub> = 7.5 Hz; ArH), 6.77–6.70 (m, 12H; ArH), 6.65 (t, 4H, <sup>3</sup>J<sub>HH</sub> = 7.5 Hz; ArH), 6.39 (t, 4H, <sup>3</sup>J<sub>HH</sub> = 7.5 Hz; ArH), 5.07–5.01 (m, 8H; NCH<sub>2</sub>), 4.87 (s, 8H; OCH<sub>2</sub>Trz), 4.42–4.36 (m, 8H; NCH<sub>2</sub>CH<sub>2</sub>), 4.05 (d, 8H, <sup>2</sup>J<sub>HH</sub> = 13.2 Hz; ArCH<sub>2</sub>Ar), 3.61 (s, 8H; ArCH<sub>2</sub>Ar), 3.45 (d, 8H, <sup>2</sup>J<sub>HH</sub> = 13.2 Hz; ArCH<sub>2</sub>Ar) ppm; <sup>13</sup>C NMR (100 MHz, CDCl<sub>3</sub>): δ = 155.83, 152.60, 150.75 (C<sub>Ar</sub>), 144.80 (C<sub>Ar</sub> Trz), 134.12, 132.25 (C<sub>Ar</sub>), 129.36, 129.03, 128.80 (CH<sub>Ar</sub>), 127.32 (C<sub>Ar</sub>), 126.08 (CH<sub>Ar</sub>), 125.07 (CH<sub>Ar</sub> Trz), 122.67, 119.58 (CH<sub>Ar</sub>), 74.00, 63.57 (OCH<sub>2</sub>),

49.12 (NCH<sub>2</sub>), 37.93, 31.16 (ArCH<sub>2</sub>Ar) ppm. ESI-MS *m/z*: 1702.7060 [M+H]<sup>+</sup> for C<sub>104</sub>H<sub>93</sub>N<sub>12</sub>O<sub>12</sub> (1702.7062).

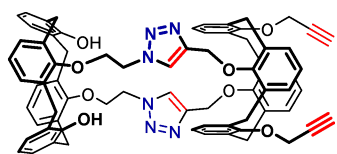

*Bis(calix[4]arene) 16* was collected during purification of the tris(calixarene) **15** by column chromatography. Yield 0.015 g (15%), white solid. M.p. 219–221 °C. <sup>1</sup>H NMR (400 MHz, CDCl<sub>3</sub>): δ = 7.19

(d, 4H, <sup>3</sup>J<sub>HH</sub> = 7.5 Hz; ArH), 7.10 (d, 4H, <sup>3</sup>J<sub>HH</sub> = 7.5 Hz; ArH), 7.06 (s, 2H; OH), 6.97 (s, 2H; ArH<sub>Trz</sub>), 6.96 (t, 2H, <sup>3</sup>J<sub>HH</sub> = 7.5 Hz; ArH), 6.87 (d, 4H, <sup>3</sup>J<sub>HH</sub> = 7.5 Hz; ArH), 6.75 (t, 2H, <sup>3</sup>J<sub>HH</sub> = 7.5 Hz; ArH), 6.72 (t, 2H, <sup>3</sup>J<sub>HH</sub> = 7.5 Hz; ArH), 6.70 (d, 4H, <sup>3</sup>J<sub>HH</sub> = 7.5 Hz; ArH), 6.32 (t, 2H, <sup>3</sup>J<sub>HH</sub> = 7.5 Hz; ArH), 5.08–5.02 (m, 4H; NCH<sub>2</sub>), 4.86 (s, 4H; OCH<sub>2</sub>Trz), 4.43–4.36 (m, 4H; NCH<sub>2</sub>CH<sub>2</sub>), 4.05 (d, 4H, <sup>2</sup>J<sub>HH</sub> = 13.2 Hz; ArCH<sub>2</sub>Ar), 3.92 (d, 4H, <sup>2</sup>J<sub>HH</sub> = 15.8 Hz; ArCH<sub>2</sub>Ar), 3.62 (d, 4H, <sup>2</sup>J<sub>HH</sub> = 15.8 Hz; ArCH<sub>2</sub>Ar), 3.60 (d, 4H, <sup>4</sup>J<sub>HH</sub> = 2.4 Hz; OCH<sub>2</sub>C), 3.46 (d, 8H, <sup>2</sup>J<sub>HH</sub> = 13.2 Hz; ArCH<sub>2</sub>Ar), 2.30 (t, 2H, <sup>4</sup>J<sub>HH</sub> = 2.4 Hz; CH) ppm; <sup>13</sup>C NMR (100 MHz, CDCl<sub>3</sub>): δ = 155.72, 155.30, 152.63, 150.82 (C<sub>Ar</sub>), 144.80 (C<sub>Ar Trz</sub>), 135.17, 134.27, 132.35 (C<sub>Ar</sub>), 130.19, 129.40, 129.25, 128.79 (CH<sub>Ar</sub>), 127.38 (C<sub>Ar</sub>), 126.11 (CH<sub>Ar</sub>), 125.24 (CH<sub>Ar Trz</sub>), 124.22, 122.51, 119.63 (CH<sub>Ar</sub>), 80.39 (CCH), 74.42 (CH), 74.05, 64.09, 58.16 (OCH<sub>2</sub>), 49.15 (NCH<sub>2</sub>), 38.09, 31.17 (ArCH<sub>2</sub>Ar) ppm. ESI-MS *m/z*: 1139.4706 [M+H]<sup>+</sup> for C<sub>72</sub>H<sub>63</sub>N<sub>6</sub>O<sub>8</sub> (1139.4707).

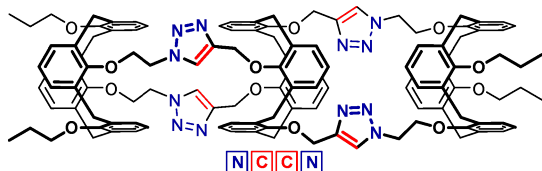

*Tris(calix[4]arene) 17* was prepared according to *General procedure* from calixarene **4** (0.129 g, 0.20 mmol), calixarene **9** (0.057 g, 0.10 mmol), CuI (0.012 g, 0.06 mmol) and Et<sub>3</sub>N (0.148 ml,

1.20 mmol) in toluene (12 ml). The reaction mixture was stirred at 60 °C for 24 h. Column: gradient from dichloromethane to dichloromethane/ethanol (50:1). Yield 0.028 g (15%), white solid. M.p. >300 °C. <sup>1</sup>H NMR (400 MHz, CDCl<sub>3</sub>): δ = 7.08 (d, 8H, <sup>3</sup>J<sub>HH</sub> = 7.5 Hz; ArH), 6.94 (d, 8H, <sup>3</sup>J<sub>HH</sub> = 7.5 Hz; ArH), 6.89 (t, 4H, <sup>3</sup>J<sub>HH</sub> = 7.5 Hz; ArH), 6.82 (d, 8H, <sup>3</sup>J<sub>HH</sub> = 7.5 Hz; ArH), 6.68 (t, 4H, <sup>3</sup>J<sub>HH</sub> = 7.5 Hz; ArH), 6.49 (t, 4H, <sup>3</sup>J<sub>HH</sub> = 7.5 Hz; ArH), 6.12 (s, 4H; ArH<sub>Trz</sub>), 4.80 (s, 8H; OCH<sub>2</sub>Trz), 4.40–4.31 (m, 8H; NCH<sub>2</sub>), 4.08–3.98 (m, 8H; NCH<sub>2</sub>CH<sub>2</sub>), 3.91 (d, 8H, <sup>2</sup>J<sub>HH</sub> = 16.4 Hz; ArCH<sub>2</sub>Ar), 3.82 (d, 8H, <sup>2</sup>J<sub>HH</sub> = 16.4 Hz; ArCH<sub>2</sub>Ar), 3.58 (s, 8H; ArCH<sub>2</sub>Ar), 3.42–3.32 (m, 8H; OCH<sub>2</sub>CH<sub>2</sub>CH<sub>3</sub>), 1.19–1.07 (m, 8H; CH<sub>2</sub>CH<sub>3</sub>), 0.69 (t, 12H, <sup>3</sup>J<sub>HH</sub> = 7.5 Hz; CH<sub>3</sub>) ppm; <sup>13</sup>C NMR (100 MHz, CDCl<sub>3</sub>): δ = 157.16, 155.63, 155.02 (C<sub>Ar</sub>), 144.30 (C<sub>Ar Trz</sub>), 134.35, 134.22, 133.38 (C<sub>Ar</sub>), 129.99, 129.07, 128.46 (CH<sub>Ar</sub>), 123.30 (CH<sub>Ar Trz</sub>), 123.26, 122.57, 122.53 (CH<sub>Ar</sub>), 71.52, 68.70, 63.19 (OCH<sub>2</sub>), 48.83 (NCH<sub>2</sub>), 38.39, 38.07 (ArCH<sub>2</sub>Ar), 22.16 (CH<sub>2</sub>CH<sub>3</sub>), 9.89 (CH<sub>3</sub>) ppm. ESI-MS *m/z*: 935.9506 [M+2H]<sup>2+</sup> for C<sub>116</sub>H<sub>118</sub>N<sub>12</sub>O<sub>12</sub> (935.9507).

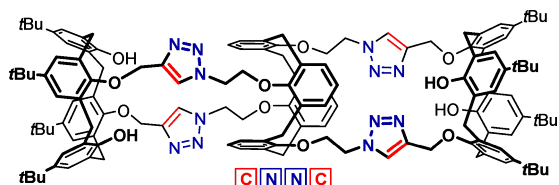

*Tris(calix[4]arene) 18* was prepared according to *General procedure* from calixarene **5** (0.290 g, 0.40 mmol), calixarene **11** (0.140 g, 0.20 mmol), CuI (0.023 g, 0.12 mmol) and Et<sub>3</sub>N (0.360 ml, 2.40 mmol) in toluene (20 ml). The reaction mixture was stirred at 60 °C for 12 h. Column: gradient from dichloromethane to dichloromethane/ethanol (70:1). Yield 0.025 g (6%), white solid. M.p. >300 °C. <sup>1</sup>H NMR (400 MHz, CDCl<sub>3</sub>): δ = 7.78 (s, 4H; ArH<sub>Trz</sub>), 7.11 (s, 12H; ArH), 7.10 (s, 8H; ArH), 6.77 (s, 8H; ArH), 6.75 (s, 4H; OH), 5.18 (s, 8H; OCH<sub>2</sub>Trz), 4.31 (d, 8H, <sup>2</sup>J<sub>HH</sub> = 13.1 Hz; ArCH<sub>2</sub>Ar), 4.10–4.04 (m, 8H; NCH<sub>2</sub>), 4.01 (s, 8H; ArCH<sub>2</sub>Ar), 3.62–3.54 (m, 8H; NCH<sub>2</sub>CH<sub>2</sub>), 3.39 (d, 8H, <sup>2</sup>J<sub>HH</sub> = 13.1 Hz; ArCH<sub>2</sub>Ar), 1.31 (s, 36H; C(CH<sub>3</sub>)<sub>3</sub>), 0.92 (s, 36H; C(CH<sub>3</sub>)<sub>3</sub>) ppm; <sup>13</sup>C NMR (100 MHz, CDCl<sub>3</sub>): δ = 155.82, 150.32, 149.51, 147.49 (C<sub>Ar</sub>), 144.81 (C<sub>Ar Trz</sub>), 141.97, 133.61, 132.18 (C<sub>Ar</sub>), 128.93 (CH<sub>Ar</sub>), 127.81 (C<sub>Ar</sub>), 125.64, 125.16 (CH<sub>Ar</sub>), 123.98 (CH<sub>Ar Trz</sub>)\*, 122.68 (CH<sub>Ar</sub>), 70.40, 66.59 (OCH<sub>2</sub>), 48.68 (NCH<sub>2</sub>), 37.97 (ArCH<sub>2</sub>Ar), 33.91, 33.85 (C(CH<sub>3</sub>)<sub>3</sub>), 31.67 (C(CH<sub>3</sub>)<sub>3</sub>), 31.45 (ArCH<sub>2</sub>Ar), 30.92 (C(CH<sub>3</sub>)<sub>3</sub>) ppm; ESI-MS *m/z*: 1098.0884 [M+2Na]<sup>2+</sup> for C<sub>136</sub>H<sub>156</sub>Na<sub>2</sub>N<sub>12</sub>O<sub>12</sub> (1098.0892); 2173.1874 [M+Na]<sup>+</sup> for C<sub>136</sub>H<sub>156</sub>NaN<sub>12</sub>O<sub>12</sub> (2173.1891).

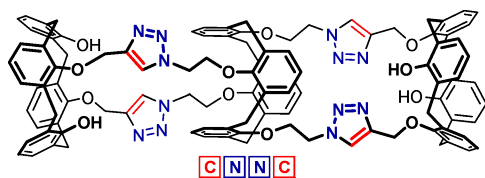

*Tris(calix[4]arene) 19* was prepared according to *General procedure* from calixarene **6** (0.100 g, 0.20 mmol), calixarene **11** (0.070 g, 0.10 mmol), CuI (0.011 g, 0.06 mmol) and Et<sub>3</sub>N (0.15 ml) in toluene (15 ml). The reaction mixture was stirred at 60 °C for 12 h. Column: gradient from dichloromethane to dichloromethane/ethanol (50:1). Yield 0.025 g (14%), white solid. M.p. >300 °C. <sup>1</sup>H NMR (400 MHz, CDCl<sub>3</sub>): δ = 7.74 (s, 4H; ArH<sub>Trz</sub>), 7.44 (s, 4H; OH), 7.13–7.08 (m, 20H; ArH), 6.88 (d, 8H, <sup>3</sup>J<sub>HH</sub> = 7.5 Hz; ArH), 6.75 (t, 4H, <sup>3</sup>J<sub>HH</sub> = 7.5 Hz; ArH), 6.71 (t, 4H, <sup>3</sup>J<sub>HH</sub> = 7.5 Hz; ArH), 5.19 (s, 8H; OCH<sub>2</sub>Trz), 4.36 (d, 8H, <sup>2</sup>J<sub>HH</sub> = 13.2 Hz; ArCH<sub>2</sub>Ar), 4.09–4.03 (m, 8H; NCH<sub>2</sub>), 4.01 (s, 8H; ArCH<sub>2</sub>Ar), 3.69–3.63 (m, 8H; NCH<sub>2</sub>CH<sub>2</sub>), 3.46 (d, 8H, <sup>2</sup>J<sub>HH</sub> = 13.2 Hz; ArCH<sub>2</sub>Ar) ppm; <sup>13</sup>C NMR (100 MHz, CDCl<sub>3</sub>): δ = 155.81, 153.02, 151.75 (C<sub>Ar</sub>), 144.22 (C<sub>Ar Trz</sub>), 133.57, 132.80 (C<sub>Ar</sub>), 129.16, 129.01, 128.66 (CH<sub>Ar</sub>), 127.88 (C<sub>Ar</sub>), 125.79 (CH<sub>Ar</sub>), 124.04 (CH<sub>Ar Trz</sub>), 122.64, 119.33 (CH<sub>Ar</sub>), 70.42, 66.97 (OCH<sub>2</sub>), 48.81 (NCH<sub>2</sub>), 37.96, 31.29 (ArCH<sub>2</sub>Ar) ppm. ESI-MS *m/z*: 1724.6871 [M+Na]<sup>+</sup> for C<sub>104</sub>H<sub>92</sub>NaN<sub>12</sub>O<sub>12</sub> (1724.6883).

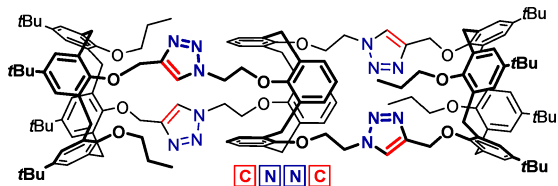

*Tris(calix[4]arene) 20* was prepared according to *General procedure* from calixarene **7** (0.194 g, 0.24 mmol), calixarene **11** (0.084 g, 0.12 mmol), CuI (0.046 g, 0.24 mmol) and Et<sub>3</sub>N (4 ml) in toluene (15 ml). The reaction mixture was stirred at 70 °C for 9 h. Column: gradient from dichloromethane to dichloromethane/ethanol (40:1), the product separated from the column was additionally washed with methanol. Yield 0.060 g (22%), white solid. M.p. >300 °C. <sup>1</sup>H NMR (400 MHz, CDCl<sub>3</sub>): δ = 7.40 (s, 4H; ArH<sub>Trz</sub>), 7.08 (s, 8H; ArH), 6.90–6.81 (m, 12H; ArH), 6.43 (s, 8H; ArH), 5.28 (s, 8H; OCH<sub>2</sub>Trz), 4.26 (d, 8H, <sup>2</sup>J<sub>HH</sub> = 12.8 Hz; ArCH<sub>2</sub>Ar), 4.07–4.01 (m, 8H; NCH<sub>2</sub>), 3.90–3.84 (m, 8H; NCH<sub>2</sub>CH<sub>2</sub>), 3.82 (s, 8H; ArCH<sub>2</sub>Ar), 3.71–3.65 (m, 8H; OCH<sub>2</sub>CH<sub>2</sub>CH<sub>3</sub>), 3.09 (d, 8H, <sup>2</sup>J<sub>HH</sub> = 12.8 Hz; ArCH<sub>2</sub>Ar), 1.82–1.71 (m, 8H; CH<sub>2</sub>CH<sub>3</sub>), 1.31 (s, 36H; C(CH<sub>3</sub>)<sub>3</sub>), 1.05 (t, 12H, <sup>3</sup>J<sub>HH</sub> = 7.5 Hz; CH<sub>3</sub>), 0.81 (s, 36H; C(CH<sub>3</sub>)<sub>3</sub>) ppm; <sup>13</sup>C NMR (100 MHz, CDCl<sub>3</sub>+CD<sub>3</sub>OD): δ = 155.77, 153.33, 152.24, 145.27, 145.12 (C<sub>Ar</sub>), 144.03 (C<sub>Ar</sub>Trz)\*, 135.39, 133.36, 131.53 (C<sub>Ar</sub>), 129.41, 125.69, 125.16, 124.31 (CH<sub>Ar</sub>), 122.51 (CH<sub>Ar</sub>Trz)\*, 76.96, 68.35, 65.52 (OCH<sub>2</sub>), 49.62 (NCH<sub>2</sub>), 36.92 (ArCH<sub>2</sub>Ar), 33.89, 33.40 (C(CH<sub>3</sub>)<sub>3</sub>), 31.48 (C(CH<sub>3</sub>)<sub>3</sub>), 31.05 (ArCH<sub>2</sub>Ar), 30.92 (C(CH<sub>3</sub>)<sub>3</sub>), 23.17 (CH<sub>2</sub>CH<sub>3</sub>), 10.50 (CH<sub>3</sub>) ppm. ESI-MS *m/z*: 1171.1915 [M+H+Na]<sup>2+</sup> for C<sub>148</sub>H<sub>181</sub>NaN<sub>12</sub>O<sub>12</sub> (1171.1921); 1182.1825 [M+2Na]<sup>2+</sup> for C<sub>148</sub>H<sub>180</sub>Na<sub>2</sub>N<sub>12</sub>O<sub>12</sub> (1182.1831).

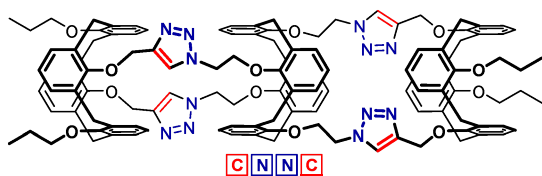

*Tris(calix[4]arene) 21* was prepared according to *General procedure* from calixarene **8** (0.234 g, 0.40 mmol), calixarene **11** (0.140 g, 0.20 mmol), CuI (0.076 g, 0.40 mmol) and Et<sub>3</sub>N (1.12 ml, 8.0 mmol) in a mixture of toluene (10 ml) and 1,2-dichloroethane (10 ml). The reaction mixture was stirred at room temperature for 48 h. Column: gradient from dichloromethane to dichloromethane/ethanol (50:1). Yield 0.041 g (11%), white solid. M.p. >300 °C. <sup>1</sup>H NMR (400 MHz, CDCl<sub>3</sub>): δ = 7.12 (d, 8H, <sup>3</sup>J<sub>HH</sub> = 7.5 Hz; ArH), 7.06 (d, 8H, <sup>3</sup>J<sub>HH</sub> = 7.5 Hz; ArH), 6.89 (t, 4H, <sup>3</sup>J<sub>HH</sub> = 7.5 Hz; ArH), 6.86 (t, 4H, <sup>3</sup>J<sub>HH</sub> = 7.5 Hz; ArH), 6.78 (d, 8H, <sup>3</sup>J<sub>HH</sub> = 7.5 Hz; ArH), 6.43 (s, 4H; ArH<sub>Trz</sub>), 6.36 (t, 4H, <sup>3</sup>J<sub>HH</sub> = 7.5 Hz; ArH), 4.85 (s, 8H; OCH<sub>2</sub>Trz), 4.15 (s, 16H; NCH<sub>2</sub>CH<sub>2</sub>), 4.01 (s, 8H; ArCH<sub>2</sub>Ar), 3.77 (d, 8H, <sup>2</sup>J<sub>HH</sub> = 15.5 Hz; ArCH<sub>2</sub>Ar), 3.62 (d, 8H, <sup>2</sup>J<sub>HH</sub> = 15.5 Hz; ArCH<sub>2</sub>Ar), 3.43–3.37 (m, 8H; OCH<sub>2</sub>CH<sub>2</sub>CH<sub>3</sub>), 1.48–1.37 (m, 8H; CH<sub>2</sub>CH<sub>3</sub>), 0.75 (t, 12H, <sup>3</sup>J<sub>HH</sub> = 7.5 Hz; CH<sub>3</sub>) ppm; <sup>13</sup>C NMR (100 MHz, CDCl<sub>3</sub>+CD<sub>3</sub>OD): δ = 156.89, 155.93, 154.79 (C<sub>Ar</sub>), 144.52 (C<sub>Ar</sub>Trz), 134.28, 133.82 (C<sub>Ar</sub>), 129.88, 129.28, 129.07 (CH<sub>Ar</sub>), 123.95 (CH<sub>Ar</sub>Trz)\*, 123.64, 122.92, 120.69 (CH<sub>Ar</sub>), 71.96, 67.88, 63.41 (OCH<sub>2</sub>), 48.41 (NCH<sub>2</sub>), 38.09, 37.68 (ArCH<sub>2</sub>Ar), 22.87 (CH<sub>2</sub>CH<sub>3</sub>),

9.90 (CH<sub>3</sub>) ppm. ESI-MS *m/z*: 957.9321 [M+2Na]<sup>2+</sup> for C<sub>116</sub>H<sub>116</sub>Na<sub>2</sub>N<sub>12</sub>O<sub>12</sub> (957.9327); 1892.8754 [M+Na]<sup>+</sup> for C<sub>116</sub>H<sub>116</sub>NaN<sub>12</sub>O<sub>12</sub> (1892.8761).

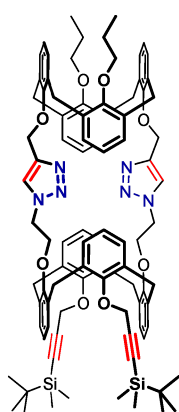

*Bis(calix[4]arene) 22* was prepared according to *General procedure* from calixarene **13** (0.554 g, 0.64 mmol), calixarene **8** (0.373 g, 0.64 mmol), CuSO<sub>4</sub>·5H<sub>2</sub>O (0.160 g, 0.64 mmol) and sodium ascorbate (0.253 g, 1.28 mmol) in a mixture of THF (76 ml) and water (15 ml). The reaction mixture was stirred at 60 °C for 24 h. Column 1: gradient from dichloromethane to dichloromethane/ethanol (50:1). Column 2: gradient from hexane to hexane/ethyl acetate (5:1). Yield 0.420 g (45%), white solid. M.p. >300 °C. <sup>1</sup>H NMR (400 MHz, CDCl<sub>3</sub>): δ = 7.19 (d, 4H, <sup>3</sup>J<sub>HH</sub> = 7.5 Hz; ArH), 7.04 (d, 4H, <sup>3</sup>J<sub>HH</sub> = 7.5 Hz; ArH), 6.92 (d, 4H, <sup>3</sup>J<sub>HH</sub> = 7.5 Hz; ArH), 6.90 (t, 2H, <sup>3</sup>J<sub>HH</sub> = 7.5 Hz; ArH), 6.87 (t, 2H, <sup>3</sup>J = 7.5 Hz; ArH), 6.82 (d, 4H, <sup>3</sup>J<sub>HH</sub> = 7.5 Hz; ArH), 6.67 (t, 2H, <sup>3</sup>J<sub>HH</sub> = 7.5 Hz; ArH), 6.39 (t, 2H, <sup>3</sup>J<sub>HH</sub> = 7.5 Hz; ArH), 6.17 (s, 2H; ArH<sub>Trz</sub>), 4.80 (s, 4H; OCH<sub>2</sub>Trz), 4.45–4.39 (m, 4H; NCH<sub>2</sub>), 4.13–4.08 (m, 4H; NCH<sub>2</sub>CH<sub>2</sub>), 4.04 (d, 4H, <sup>2</sup>J<sub>HH</sub> = 15.8 Hz; ArCH<sub>2</sub>Ar), 4.02 (s, 4H; OCH<sub>2</sub>CC), 3.80 (d, 4H, <sup>2</sup>J<sub>HH</sub> = 15.2 Hz; ArCH<sub>2</sub>Ar), 3.76 (d, 4H, <sup>2</sup>J<sub>HH</sub> = 15.2 Hz; ArCH<sub>2</sub>Ar), 3.62 (d, 4H, <sup>2</sup>J<sub>HH</sub> = 15.8 Hz; ArCH<sub>2</sub>Ar), 3.35–3.28 (m, 4H; OCH<sub>2</sub>CH<sub>2</sub>CH<sub>3</sub>), 1.36–1.26 (m, 4H; CH<sub>2</sub>CH<sub>3</sub>), 0.87 (s, 18H; C(CH<sub>3</sub>)<sub>3</sub>), 0.68 (t, 6H, <sup>3</sup>J<sub>HH</sub> = 7.5 Hz; CH<sub>3</sub>), 0.08 (s, 12H; SiCH<sub>3</sub>) ppm; <sup>13</sup>C NMR (100 MHz, CDCl<sub>3</sub>): δ = 156.94, 155.63, 155.55, 154.74 (C<sub>Ar</sub>), 144.26 (C<sub>Ar</sub>Trz), 135.23, 134.44, 134.06, 133.51 (C<sub>Ar</sub>), 130.25, 129.75, 129.03, 128.44 (CH<sub>Ar</sub>), 124.41 (CH<sub>Ar</sub>Trz),\* 123.69, 123.08, 121.39 (CH<sub>Ar</sub>), 102.57 (OCH<sub>2</sub>C), 89.94 (OCH<sub>2</sub>CC), 71.79, 68.67, 63.21 (OCH<sub>2</sub>), 58.33 (OCH<sub>2</sub>CC), 49.04 (NCH<sub>2</sub>), 38.25, 38.13 (ArCH<sub>2</sub>Ar), 25.95 (C(CH<sub>3</sub>)<sub>3</sub>), 22.89 (CH<sub>2</sub>CH<sub>3</sub>), 16.38 (C(CH<sub>3</sub>)<sub>3</sub>), 10.07 (CH<sub>2</sub>CH<sub>3</sub>), -4.84 (SiCH<sub>3</sub>) ppm. ESI-MS *m/z*: 1452.7400 [M+H]<sup>+</sup> for C<sub>90</sub>H<sub>103</sub>N<sub>6</sub>O<sub>8</sub>Si<sub>2</sub> (1452.7400).

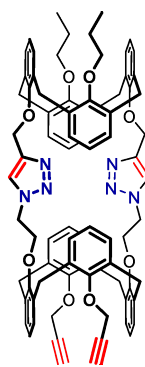

*Bis(calix[4]arene) 23*. To a suspension of bis(calix[4]arene) **22** (0.420 g, 0.29 mmol) in THF (1.7 ml) a solution of *n*Bu<sub>4</sub>NF·3H<sub>2</sub>O (0.018 g, 0.058 mmol) in THF (1.7 ml) and water (0.034 ml) was added. The mixture was stirred at 50 °C for 12 h and cooled to room temperature. The solvent was removed and the residue was dissolved in dichloromethane. The solid formed was collected and dissolved in dichloromethane. Methanol was added, and the solid formed was collected and dried. Yield 0.250 g (70%), white solid. M.p. 294–296 °C. <sup>1</sup>H NMR (400 MHz, CDCl<sub>3</sub>): δ = 7.21 (d, 4H, <sup>3</sup>J<sub>HH</sub> = 7.5 Hz; ArH), 7.05 (d, 4H, <sup>3</sup>J<sub>HH</sub> = 7.5 Hz; ArH), 6.97 (d, 4H,



$^3J_{\text{HH}} = 7.5$  Hz; ArH), 6.95 (t, 2H,  $^3J_{\text{HH}} = 7.5$  Hz; ArH), 6.87 (t, 2H,  $^3J_{\text{HH}} = 7.5$  Hz; ArH), 6.82 (d, 4H,  $^3J_{\text{HH}} = 7.5$  Hz; ArH), 6.73 (t, 2H,  $^3J_{\text{HH}} = 7.5$  Hz; ArH), 6.38 (t, 2H,  $^3J_{\text{HH}} = 7.5$  Hz; ArH), 6.21 (s, 2H; ArH<sub>Trz</sub>), 4.81 (s, 4H; OCH<sub>2</sub>Trz), 4.39–4.32 (m, 4H; NCH<sub>2</sub>), 4.14–4.07 (m, 4H; NCH<sub>2</sub>CH<sub>2</sub>), 4.05 (d, 4H,  $^2J_{\text{HH}} = 16.1$  Hz; ArCH<sub>2</sub>Ar), 3.84 (d, 4H,  $^4J_{\text{HH}} = 2.4$  Hz; OCH<sub>2</sub>CC), 3.81 (d, 4H,  $^2J_{\text{HH}} = 16.1$  Hz; ArCH<sub>2</sub>Ar), 3.79 (d, 4H,  $^2J_{\text{HH}} = 15.8$  Hz; ArCH<sub>2</sub>Ar), 3.63 (d, 4H,  $^2J_{\text{HH}} = 15.8$  Hz; ArCH<sub>2</sub>Ar), 3.37–3.30 (m, 4H; OCH<sub>2</sub>CH<sub>2</sub>CH<sub>3</sub>), 2.33 (t, 2H,  $^4J_{\text{HH}} = 2.4$  Hz; CH), 1.38–1.26 (m, 4H; CH<sub>2</sub>CH<sub>3</sub>), 0.68 (t, 6H,  $^3J_{\text{HH}} = 7.5$  Hz; CH<sub>3</sub>) ppm;  $^{13}\text{C}$  NMR (100 MHz, CDCl<sub>3</sub>):  $\delta = 156.92, 155.56, 155.50, 154.74$  (C<sub>Ar</sub>), 144.30 (C<sub>Ar</sub>Trz), 135.17, 134.41, 134.02, 133.52 (C<sub>Ar</sub>), 130.43, 129.79, 129.09, 128.68 (CH<sub>Ar</sub>), 124.28 (CH<sub>Ar</sub>Trz), 124.00, 123.28, 123.07, 121.25 (CH<sub>Ar</sub>), 80.10 (OCH<sub>2</sub>CCH), 74.72 (OCH<sub>2</sub>CCH), 71.85, 68.70, 63.24 (OCH<sub>2</sub>), 57.83 (OCH<sub>2</sub>CCH), 48.88 (NCH<sub>2</sub>), 38.24, 38.07 (ArCH<sub>2</sub>Ar), 22.89 (CH<sub>2</sub>CH<sub>3</sub>), 10.06 (CH<sub>2</sub>CH<sub>3</sub>) ppm. ESI-MS  $m/z$ : 1223.5637 [M+H]<sup>+</sup> for C<sub>78</sub>H<sub>75</sub>N<sub>6</sub>O<sub>8</sub> (1223.5641).

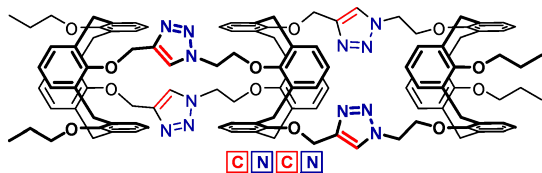

*Tris(calix[4]arene) 24* was prepared according to *General procedure* from bis(calix[4]arene) **23** (0.122 g, 0.10 mmol), calixarene **4** (0.065 g, 0.10 mmol), CuSO<sub>4</sub>·5H<sub>2</sub>O (0.025 g, 0.10 mmol) and

sodium ascorbate (0.040 g, 0.20 mmol) in a mixture of THF (12 ml) and water (2.4 ml). The reaction mixture was stirred at 60 °C for 24 h. Column: gradient from dichloromethane to dichloromethane/ethanol (40:1). Yield 0.048 g (26%), white solid. M.p. >300 °C.  $^1\text{H}$  NMR (400 MHz, CDCl<sub>3</sub>):  $\delta = 7.09$  (d, 4H,  $^3J_{\text{HH}} = 7.5$  Hz; ArH), 7.05 (d, 4H,  $^3J_{\text{HH}} = 7.5$  Hz; ArH), 6.99 (d, 4H,  $^3J_{\text{HH}} = 7.5$  Hz; ArH), 6.96–6.85 (m, 12H; ArH), 6.81 (d, 4H,  $^3J_{\text{HH}} = 7.5$  Hz; ArH), 6.77 (t, 2H,  $^3J_{\text{HH}} = 7.5$  Hz; ArH), 6.65 (t, 2H,  $^3J_{\text{HH}} = 7.5$  Hz; ArH), 6.50 (t, 2H,  $^3J_{\text{HH}} = 7.5$  Hz; ArH), 6.37 (t, 2H,  $^3J_{\text{HH}} = 7.5$  Hz; ArH), 6.13 (s, 2H; ArH<sub>Trz</sub>), 6.11 (s, 2H; ArH<sub>Trz</sub>), 4.79 (s, 4H; OCH<sub>2</sub>Trz), 4.78 (s, 4H; OCH<sub>2</sub>Trz), 4.51–4.40 (m, 8H; NCH<sub>2</sub>), 4.14–4.07 (m, 4H; NCH<sub>2</sub>CH<sub>2</sub>), 4.07–4.01 (m, 4H; NCH<sub>2</sub>CH<sub>2</sub>), 3.91 (d, 4H,  $^2J_{\text{HH}} = 16.4$  Hz; ArCH<sub>2</sub>Ar), 3.84 (s, 4H; ArCH<sub>2</sub>Ar), 3.80 (d, 4H,  $^2J_{\text{HH}} = 15.8$  Hz; ArCH<sub>2</sub>Ar), 3.79 (s, 4H; ArCH<sub>2</sub>Ar), 3.69 (d, 4H,  $^2J_{\text{HH}} = 16.4$  Hz; ArCH<sub>2</sub>Ar), 3.60 (d, 4H,  $^2J_{\text{HH}} = 15.8$  Hz; ArCH<sub>2</sub>Ar), 3.43–3.36 (m, 4H; OCH<sub>2</sub>CH<sub>2</sub>CH<sub>3</sub>), 3.36–3.29 (m, 4H; OCH<sub>2</sub>CH<sub>2</sub>CH<sub>3</sub>), 1.38–1.26 (m, 4H; CH<sub>2</sub>CH<sub>3</sub>), 1.21–1.08 (m, 4H; CH<sub>2</sub>CH<sub>3</sub>), 0.71 (t, 6H,  $^3J_{\text{HH}} = 7.5$  Hz; CH<sub>3</sub>), 0.68 (t, 6H,  $^3J_{\text{HH}} = 7.5$  Hz; CH<sub>3</sub>) ppm;  $^{13}\text{C}$  NMR (100 MHz, CDCl<sub>3</sub>):  $\delta = 157.08, 156.94, 155.80, 155.61, 154.96, 154.63$  (C<sub>Ar</sub>), 144.30, 143.75 (C<sub>Ar</sub>Trz), 134.42, 134.39, 134.30, 134.00, 133.81, 133.30 (C<sub>Ar</sub>), 130.05, 129.74, 129.45, 128.93, 128.70, 128.37 (CH<sub>Ar</sub>), 124.25, 124.16 (CH<sub>Ar</sub>Trz), 123.61, 123.24, 123.09, 122.92, 122.44, 121.36 (CH<sub>Ar</sub>), 71.71, 71.43,

68.89, 68.64, 63.18, 63.06 (OCH<sub>2</sub>), 48.96, 48.85 (NCH<sub>2</sub>), 38.34, 38.25, 38.11 (ArCH<sub>2</sub>Ar), 22.84, 22.08 (CH<sub>2</sub>CH<sub>3</sub>), 10.05, 9.82 (CH<sub>2</sub>CH<sub>3</sub>) ppm. ESI-MS *m/z*: 1870.8942 [M+H]<sup>+</sup> for C<sub>116</sub>H<sub>117</sub>N<sub>12</sub>O<sub>12</sub> (1870.8942).

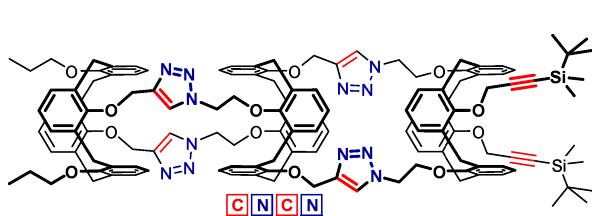

*Tris(calix[4]arene) 25* was prepared according to *General procedure* from bis(calix[4]arene) **23** (0.122 g, 0.10 mmol), calixarene **13** (0.087 g, 0.10 mmol), CuSO<sub>4</sub>·5H<sub>2</sub>O (0.025 g, 0.10 mmol)

and sodium ascorbate (0.040 g, 0.20 mmol) in a mixture of THF (12 ml) and water (2.4 ml). The reaction mixture was stirred at 60 °C for 24 h. Column 1: gradient from dichloromethane to dichloromethane/ethanol (20:1). Column 2: gradient from hexane to hexane/ethyl acetate (1:1). Yield 0.052 g (25%), white solid. M.p. >300 °C. <sup>1</sup>H NMR (400 MHz, CDCl<sub>3</sub>): δ = 7.20 (d, 4H, <sup>3</sup>J<sub>HH</sub> = 7.5 Hz; ArH), 7.05 (d, 4H, <sup>3</sup>J<sub>HH</sub> = 7.5 Hz; ArH), 6.99 (d, 4H, <sup>3</sup>J<sub>HH</sub> = 7.5 Hz; ArH), 6.92 (d, 4H, <sup>3</sup>J<sub>HH</sub> = 7.5 Hz; ArH), 6.91 (d, 4H, <sup>3</sup>J<sub>HH</sub> = 7.5 Hz; ArH), 6.88 (t, 2H, <sup>3</sup>J<sub>HH</sub> = 7.5 Hz; ArH), 6.81 (d, 4H, <sup>3</sup>J<sub>HH</sub> = 7.5 Hz; ArH), 6.77 (t, 4H, <sup>3</sup>J<sub>HH</sub> = 7.5 Hz; ArH), 6.66 (t, 2H, <sup>3</sup>J<sub>HH</sub> = 7.5 Hz; ArH), 6.52 (t, 2H, <sup>3</sup>J<sub>HH</sub> = 7.5 Hz; ArH), 6.36 (t, 2H, <sup>3</sup>J<sub>HH</sub> = 7.5 Hz; ArH), 6.14 (s, 2H; ArH<sub>Trz</sub>), 6.10 (s, 2H; ArH<sub>Trz</sub>), 4.79 (s, 8H; OCH<sub>2</sub>Trz), 4.55–4.48 (m, 4H; NCH<sub>2</sub>), 4.47–4.40 (m, 4H; NCH<sub>2</sub>), 4.14–4.07 (m, 8H; NCH<sub>2</sub>CH<sub>2</sub>), 4.05 (d, 4H, <sup>2</sup>J<sub>HH</sub> = 16.0 Hz; ArCH<sub>2</sub>Ar), 4.04 (s, 4H; OCH<sub>2</sub>CC), 3.83 (d, 4H, <sup>2</sup>J<sub>HH</sub> = 16.3 Hz; ArCH<sub>2</sub>Ar), 3.79 (d, 4H, <sup>2</sup>J<sub>HH</sub> = 16.0 Hz; ArCH<sub>2</sub>Ar), 3.75 (d, 4H, <sup>2</sup>J<sub>HH</sub> = 16.0 Hz; ArCH<sub>2</sub>Ar), 3.72 (d, 4H, <sup>2</sup>J<sub>HH</sub> = 16.3 Hz; ArCH<sub>2</sub>Ar), 3.60 (d, 4H, <sup>2</sup>J<sub>HH</sub> = 16.0 Hz; ArCH<sub>2</sub>Ar), 3.38–3.27 (m, 4H; OCH<sub>2</sub>CH<sub>2</sub>CH<sub>3</sub>), 1.36–1.25 (m, 4H; CH<sub>2</sub>CH<sub>3</sub>), 0.87 (s, 18H; C(CH<sub>3</sub>)<sub>3</sub>), 0.67 (t, 6H, <sup>3</sup>J<sub>HH</sub> = 7.5 Hz; CH<sub>3</sub>), 0.08 (s, 12H; Si(CH<sub>3</sub>)<sub>2</sub>) ppm; <sup>13</sup>C NMR (100 MHz, CDCl<sub>3</sub>): δ = 157.00, 155.86, 155.66, 155.56, 154.88, 154.68 (C<sub>Ar</sub>), 144.37, 143.75 (C<sub>Ar Trz</sub>), 135.34, 134.47, 134.31, 134.03, 133.88, 133.44 (C<sub>Ar</sub>), 130.36, 129.77, 129.44, 128.97, 128.70, 128.38 (CH<sub>Ar</sub>), 124.37, 124.26 (CH<sub>Ar Trz</sub>), 123.74, 123.66, 123.11, 123.07, 123.00, 121.37 (CH<sub>Ar</sub>), 102.51 (OCH<sub>2</sub>C), 90.05 (OCH<sub>2</sub>CC), 71.71, 68.97, 68.70, 63.25, 62.92 (OCH<sub>2</sub>), 58.32 (OCH<sub>2</sub>CC), 49.25, 48.86 (NCH<sub>2</sub>), 38.37, 38.28, 38.15 (ArCH<sub>2</sub>Ar), 25.96 (C(CH<sub>3</sub>)<sub>3</sub>), 22.88 (CH<sub>2</sub>CH<sub>3</sub>), 16.40 (C(CH<sub>3</sub>)<sub>3</sub>), 10.09 (CH<sub>2</sub>CH<sub>3</sub>), –4.84 (Si(CH<sub>3</sub>)<sub>2</sub>) ppm. ESI-MS *m/z*: 1046.0055 [M+2H]<sup>2+</sup> for C<sub>128</sub>H<sub>138</sub>N<sub>12</sub>O<sub>12</sub>Si<sub>2</sub> (1046.0059).

## Tuning the conditions for the preparation of calix[4]semitubes

Table S1 Different catalytic systems used in the CuAAC reactions between calixarenes **3** and **9**

| Entry | Catalyst (equiv per bis(azide))  | External ligand (equiv per Cu) | Solvent                    | Temp., °C | Time, h | Reaction outcome     |          |         |                |
|-------|----------------------------------|--------------------------------|----------------------------|-----------|---------|----------------------|----------|---------|----------------|
|       |                                  |                                |                            |           |         | <b>3</b> or <b>9</b> | Semitube | Polymer | Other products |
| 1     | CuI-P(OEt) <sub>3</sub> (0.3)    | –                              | THF                        | 50        | 24      | +                    | –        | +       | –              |
| 2     | CuSO <sub>4</sub> /Na asc. (0.3) | –                              | THF/H <sub>2</sub> O (5:1) | 50        | 24      | +                    | –        | –       | +              |
| 3     | CuI (0.3)                        | Et <sub>3</sub> N (20)         | toluene                    | rt        | 48      | +                    | +        | ++      | –              |
| 4     | CuI (0.3)                        | Et <sub>3</sub> N (20)         | THF                        | 50        | 24      | +                    | –        | +       | +              |
| 4     | CuI (0.3)                        | Et <sub>3</sub> N (20)         | toluene                    | 75        | 24      | –                    | +        | ++      | –              |
| 6     | CuI (0.3)                        | Et <sub>3</sub> N (20)         | toluene/1,2-dichloroethane | 60        | 9       | +                    | +        | +       | +              |

Table S2 Different catalytic systems tested in the CuAAC reactions between calixarenes **4** and **9**

| Entry | Catalyst (equiv per bis(azide))    | External ligand (equiv per Cu) | Solvent                    | Temp., °C | Time, h | Reaction outcome     |           |         |                |
|-------|------------------------------------|--------------------------------|----------------------------|-----------|---------|----------------------|-----------|---------|----------------|
|       |                                    |                                |                            |           |         | <b>4</b> or <b>9</b> | <b>17</b> | Polymer | Other products |
| 1     | CuSO <sub>4</sub> /Na asc. (0.1)   | –                              | THF/H <sub>2</sub> O (5:1) | 60        | 36      | +                    | –         | +       | +              |
| 2     | CuSO <sub>4</sub> /Na asc. (0.3)   | –                              | THF/H <sub>2</sub> O (5:1) | 60        | 24      | +                    | –         | +       | +              |
| 3     | CuSO <sub>4</sub> /Na asc. (1.0)   | –                              | THF/H <sub>2</sub> O (5:1) | 60        | 24      | –                    | –         | +       | +              |
| 4     | CuSO <sub>4</sub> /Na asc. (1.0)*  | –                              | THF/H <sub>2</sub> O (5:1) | 60        | 24      | +                    | +         | +       | –              |
| 5     | CuSO <sub>4</sub> /Na asc. (1.0)** | –                              | THF/H <sub>2</sub> O (5:1) | 60        | 24      | +                    | –         | –       | +              |
| 6     | CuI (0.3)                          | Et <sub>3</sub> N (20)         | toluene                    | rt        | 48      | +                    | +         | +       | –              |
| 7     | CuI (0.3)                          | Et <sub>3</sub> N (20)         | toluene                    | rt        | 60      | +                    | –         | ++      | +              |
| 8     | CuI (1.0)                          | Et <sub>3</sub> N (20)         | toluene                    | rt        | 48      | +                    | –         | +       | +              |
| 9     | CuI (0.1)                          | Et <sub>3</sub> N (20)         | toluene                    | 60        | 36      | –                    | +         | ++      | –              |
| 10    | CuI (0.3)                          | Et <sub>3</sub> N (20)         | toluene                    | 60        | 24      | –                    | +         | +       | –              |
| 11    | CuI (0.3)                          | Et <sub>3</sub> N (400)        | toluene                    | 60        | 24      | –                    | +         | +       | –              |
| 12    | CuI (1.0)                          | Et <sub>3</sub> N (20)         | toluene                    | 60        | 24      | –                    | +         | +       | +              |
| 13    | CuI (1.0)                          | Et <sub>3</sub> N (20)         | toluene/1,2-dichloroethane | 60        | 24      | –                    | +         | +       | +              |

\* – the reaction was conducted in a diluted solution (2 volumes of the solvent were used);

\*\* – the reaction was conducted in a diluted solution (10 volumes of the solvent were used).

Table S3 Different catalytic systems used in the CuAAC reactions between calixarenes **5** and **11**

| Entry | Catalyst (equiv per bis(alkyne)) | External ligand (equiv per Cu)    | Solvent | Temp., °C | Time, h | Reaction outcome      |           |         |                |
|-------|----------------------------------|-----------------------------------|---------|-----------|---------|-----------------------|-----------|---------|----------------|
|       |                                  |                                   |         |           |         | <b>5</b> or <b>11</b> | <b>18</b> | Polymer | Other products |
| 1     | CuI·P(OEt) <sub>3</sub> (1.0)    | –                                 | toluene | rt        | 48      | +                     | –         | –       | +              |
| 2     | CuI·P(OEt) <sub>3</sub> (1.0)    | –                                 | toluene | 60        | 5       | +                     | +         | +       | –              |
| 3     | CuI·P(OEt) <sub>3</sub> (1.0)    | <i>i</i> Pr <sub>2</sub> EtN (20) | toluene | rt        | 48      | +                     | +         | +       | –              |
| 4     | CuI·P(OEt) <sub>3</sub> (1.0)    | <i>i</i> Pr <sub>2</sub> EtN (20) | toluene | 60        | 5       | –                     | +         | +       | –              |
| 5     | CuI (1.0)                        | –                                 | toluene | rt        | 48      | +                     | –         | –       | –              |
| 6     | CuI (1.0)                        | Et <sub>3</sub> N (2)             | toluene | rt        | 48      | +                     | –         | ++      | –              |
| 7     | CuI (1.0)                        | Et <sub>3</sub> N (4)             | toluene | rt        | 48      | +                     | +         | +       | –              |
| 8     | CuI (1.0)                        | Et <sub>3</sub> N (10)            | toluene | rt        | 48      | –                     | +         | +       | –              |
| 9     | CuI (0.3)                        | Et <sub>3</sub> N (20)            | toluene | rt        | 48      | –                     | +         | +       | –              |
| 10    | CuI (1.0)                        | Et <sub>3</sub> N (20)            | toluene | rt        | 48      | –                     | +         | +       | –              |
| 11    | CuI (2.0)                        | Et <sub>3</sub> N (20)            | toluene | rt        | 48      | –                     | +         | +       | –              |
| 12    | CuI (0.3)                        | Et <sub>3</sub> N (20)            | toluene | 60        | 12      | –                     | +         | +       | –              |
| 13    | CuI (1.0)                        | Et <sub>3</sub> N (20)            | toluene | 60        | 5       | –                     | +         | +       | –              |

Table S4 Tuning the CuI/Et<sub>3</sub>N/toluene catalytic system in the CuAAC between calixarenes **7** and **11**

| Entry | Catalyst (equiv per bis(alkyne)) | External ligand (equiv per Cu) | Solvent | Temp., °C | Time, h | Reaction outcome      |           |         |                |
|-------|----------------------------------|--------------------------------|---------|-----------|---------|-----------------------|-----------|---------|----------------|
|       |                                  |                                |         |           |         | <b>7</b> or <b>11</b> | <b>20</b> | Polymer | Other products |
| 1     | CuI (1.0)                        | –                              | toluene | rt        | 48      | +                     | –         | –       | –              |
| 2     | CuI (0.3)                        | Et <sub>3</sub> N (20)         | toluene | rt        | 48      | +                     | +         | +       | +              |
| 3     | CuI (1.0)                        | Et <sub>3</sub> N (20)         | toluene | rt        | 48      | +                     | +         | +       | –              |
| 4     | CuI (2.0)                        | Et <sub>3</sub> N (20)         | toluene | rt        | 48      | –                     | +         | ++      | –              |
| 5     | CuI (1.0)                        | Et <sub>3</sub> N (400)        | toluene | 70        | 9       | –                     | +         | +       | –              |

Table S5 Different catalytic systems tested in the CuAAC reactions between calixarenes **8** and **11**

| Entry | Catalyst (equiv per bis(alkyne)) | External ligand (equiv per Cu) | Solvent                    | Temp., °C | Time, h | Reaction outcome      |           |         |                |
|-------|----------------------------------|--------------------------------|----------------------------|-----------|---------|-----------------------|-----------|---------|----------------|
|       |                                  |                                |                            |           |         | <b>8</b> or <b>11</b> | <b>21</b> | Polymer | Other products |
| 1     | CuSO <sub>4</sub> /Na asc. (0.1) | –                              | THF/H <sub>2</sub> O (5:1) | rt        | 60      | ++                    | –         | –       | +              |
| 2     | CuSO <sub>4</sub> /Na asc. (0.3) | –                              | THF/H <sub>2</sub> O (5:1) | 60        | 24      | –                     | –         | +       | +              |
| 3     | CuSO <sub>4</sub> /Na asc. (1.0) | –                              | THF/H <sub>2</sub> O (5:1) | 60        | 24      | –                     | –         | +       | +              |
| 4     | CuI (1.0)                        | –                              | toluene/dichloromethane    | rt        | 48      | ++                    | –         | –       | –              |
| 5     | CuI (0.3)                        | Et <sub>3</sub> N (20)         | toluene                    | rt        | 48      | ++                    | +         | –       | +              |
| 6     | CuI (1.0)                        | Et <sub>3</sub> N (20)         | toluene                    | rt        | 48      | +                     | +         | +       | –              |
| 7     | CuI (2.0)                        | Et <sub>3</sub> N (20)         | toluene                    | rt        | 48      | +                     | +         | +       | –              |
| 8     | CuI (0.3)                        | Et <sub>3</sub> N (20)         | toluene/1,2-dichloroethane | rt        | 48      | –                     | +         | ++      | –              |
| 9     | CuI (1.0)                        | Et <sub>3</sub> N (20)         | toluene/1,2-dichloroethane | rt        | 48      | –                     | +         | +       | –              |
| 10    | CuI (0.3)                        | Et <sub>3</sub> N (20)         | toluene/1,2-dichloroethane | 60        | 24      | +                     | +         | ++      | +              |
| 11    | CuI (1.0)                        | Et <sub>3</sub> N (20)         | toluene/1,2-dichloroethane | 60        | 24      | +                     | +         | +       | +              |

## NMR spectra of novel compounds

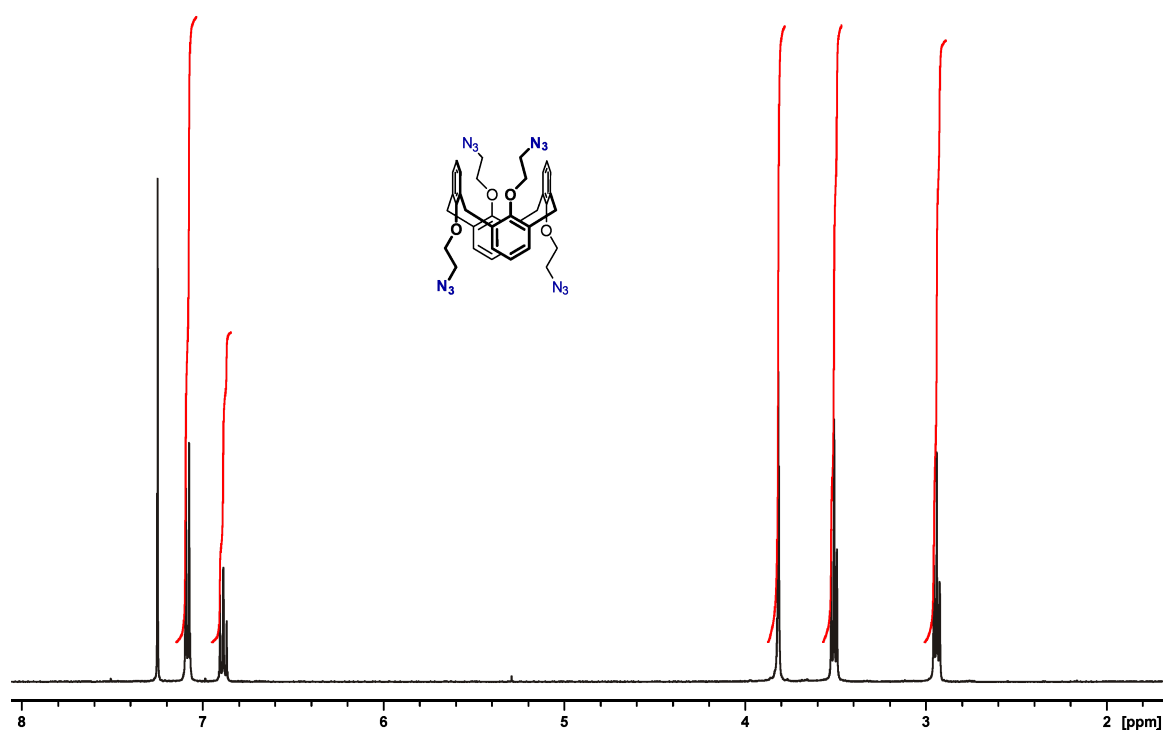

**Figure S1.**  $^1\text{H}$  NMR spectrum of calix[4]arene **11** (400 MHz,  $\text{CDCl}_3$ ).

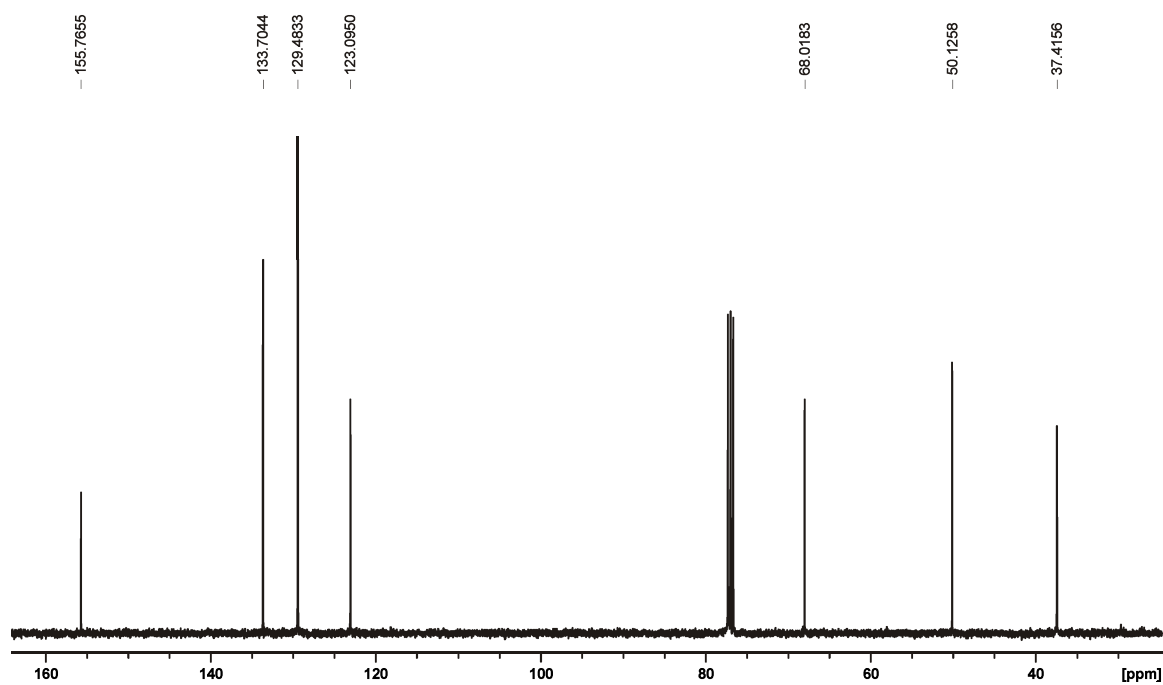

**Figure S2.**  $^{13}\text{C}$  NMR spectrum of calix[4]arene **11** (100 MHz,  $\text{CDCl}_3$ ).

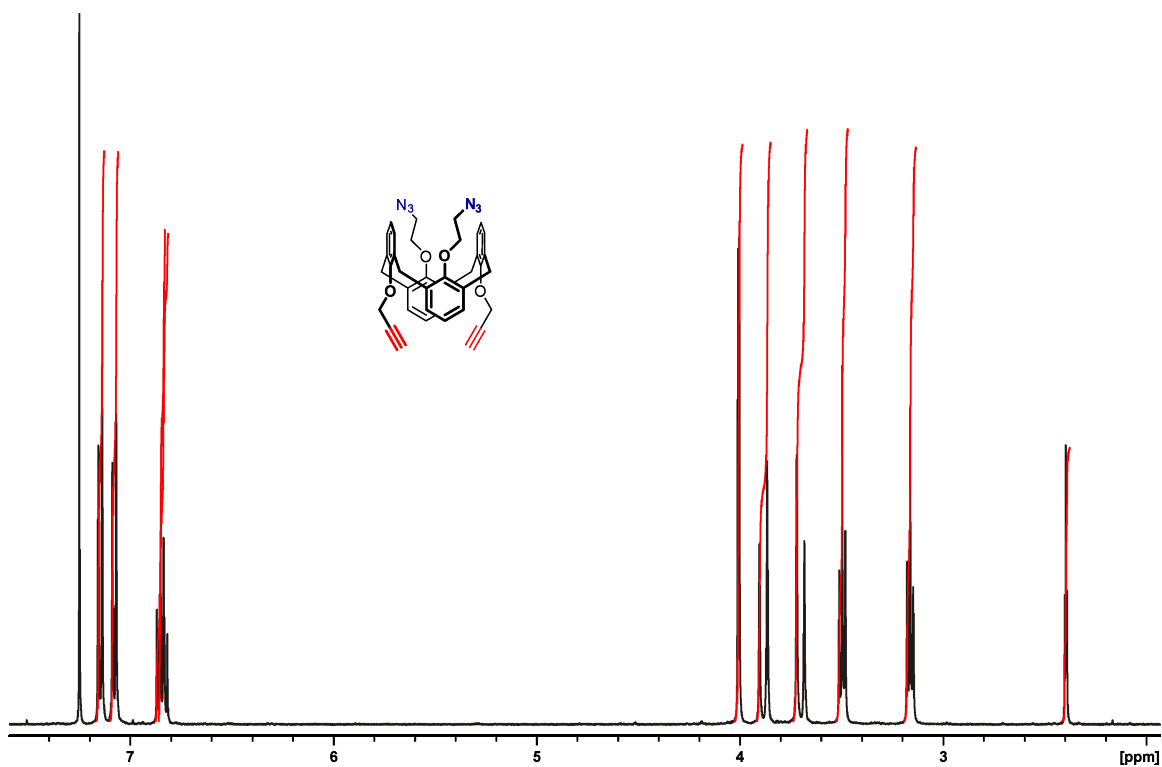

Figure S3.  $^1\text{H}$  NMR spectrum of calix[4]arene **12** (400 MHz,  $\text{CDCl}_3$ ).

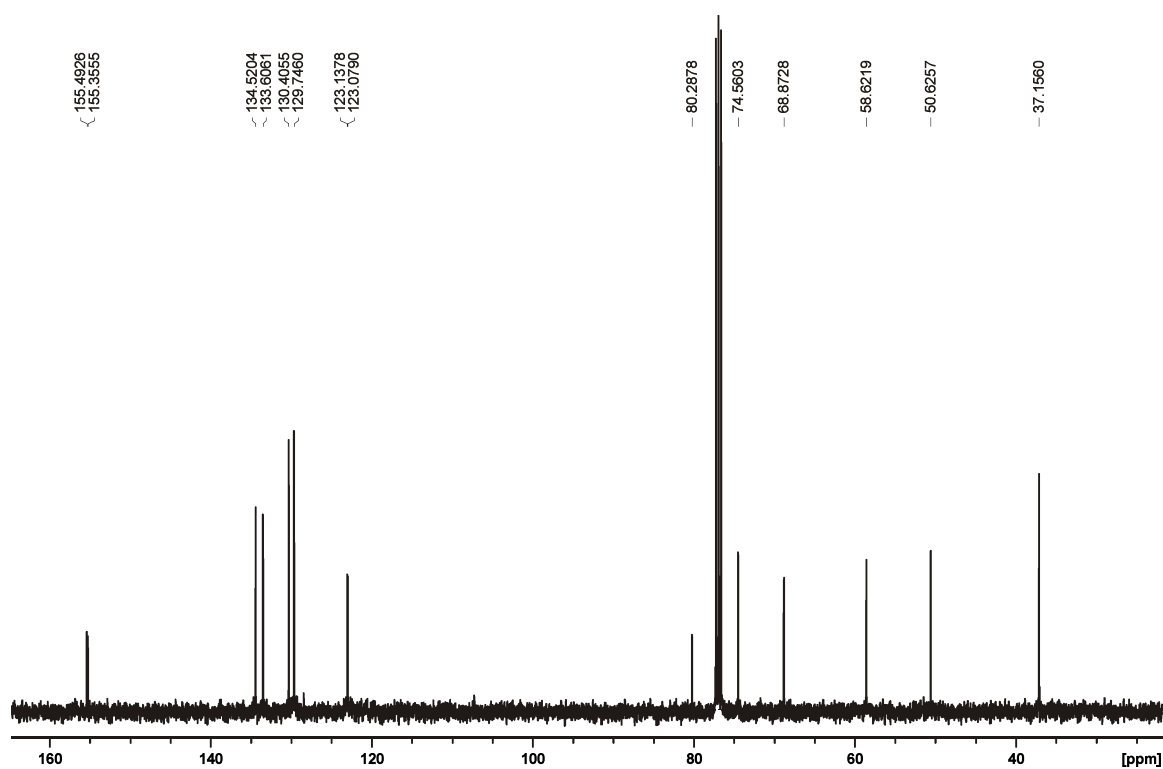

Figure S4.  $^{13}\text{C}$  NMR spectrum of calix[4]arene **12** (100 MHz,  $\text{CDCl}_3$ ).

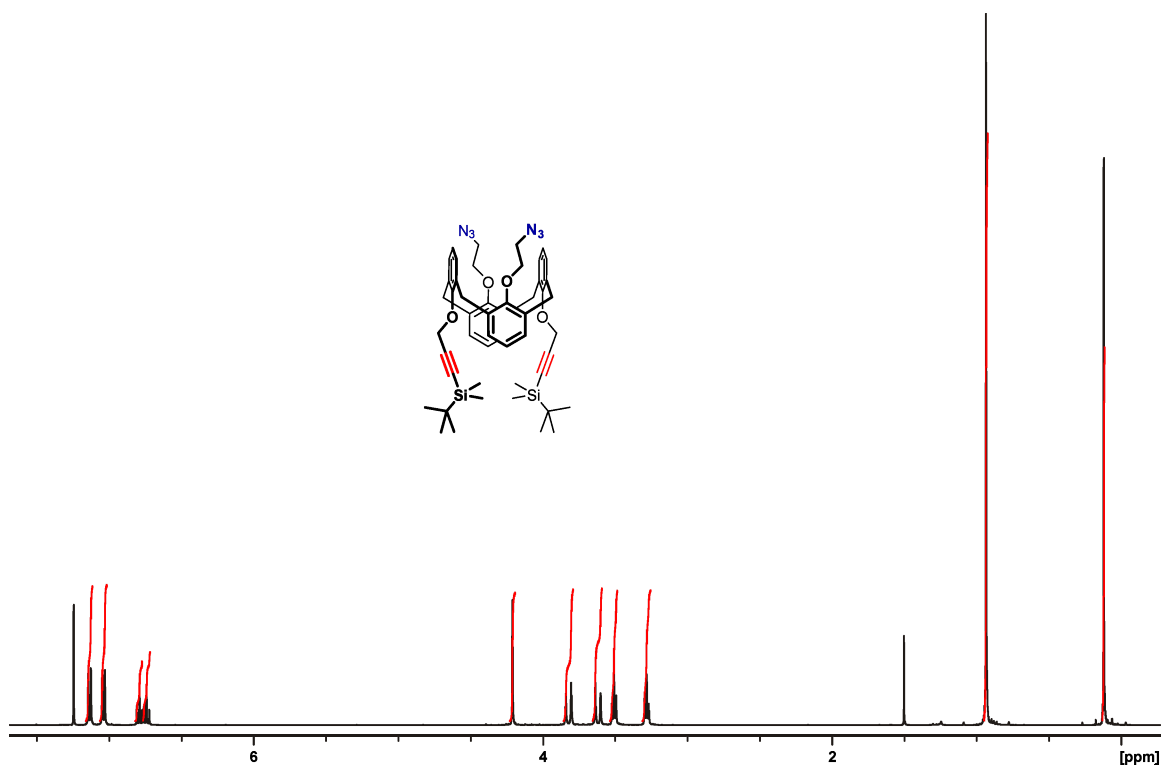

**Figure S5.**  $^1\text{H}$  NMR spectrum of calix[4]arene **13** (400 MHz,  $\text{CDCl}_3$ ).

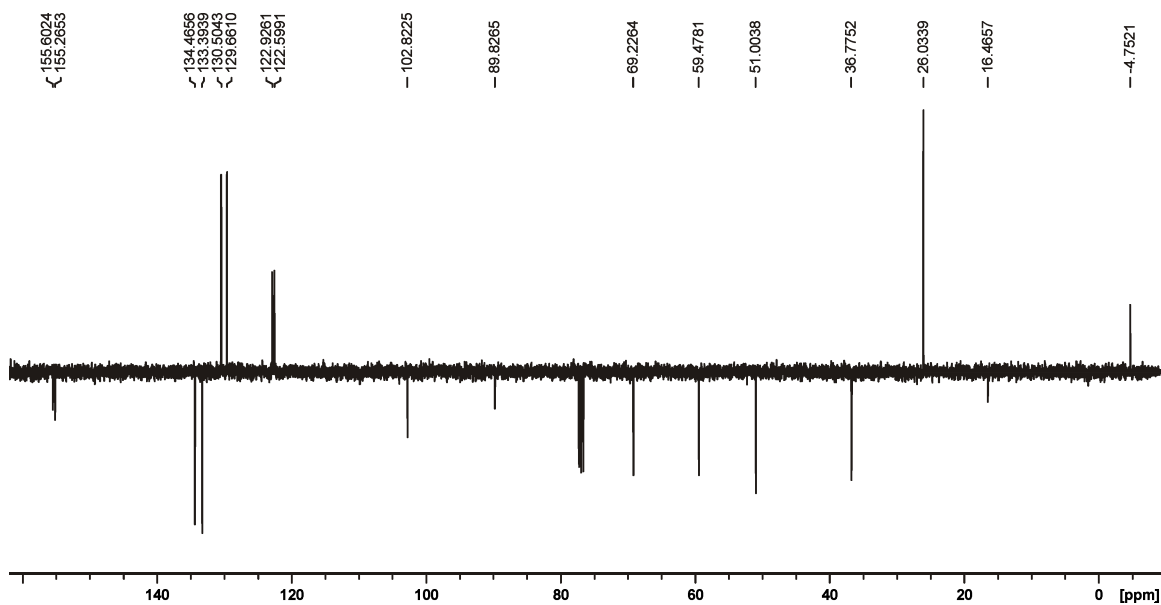

**Figure S6.**  $^{13}\text{C}$  NMR spectrum (APT) of calix[4]arene **13** (100 MHz,  $\text{CDCl}_3$ ).



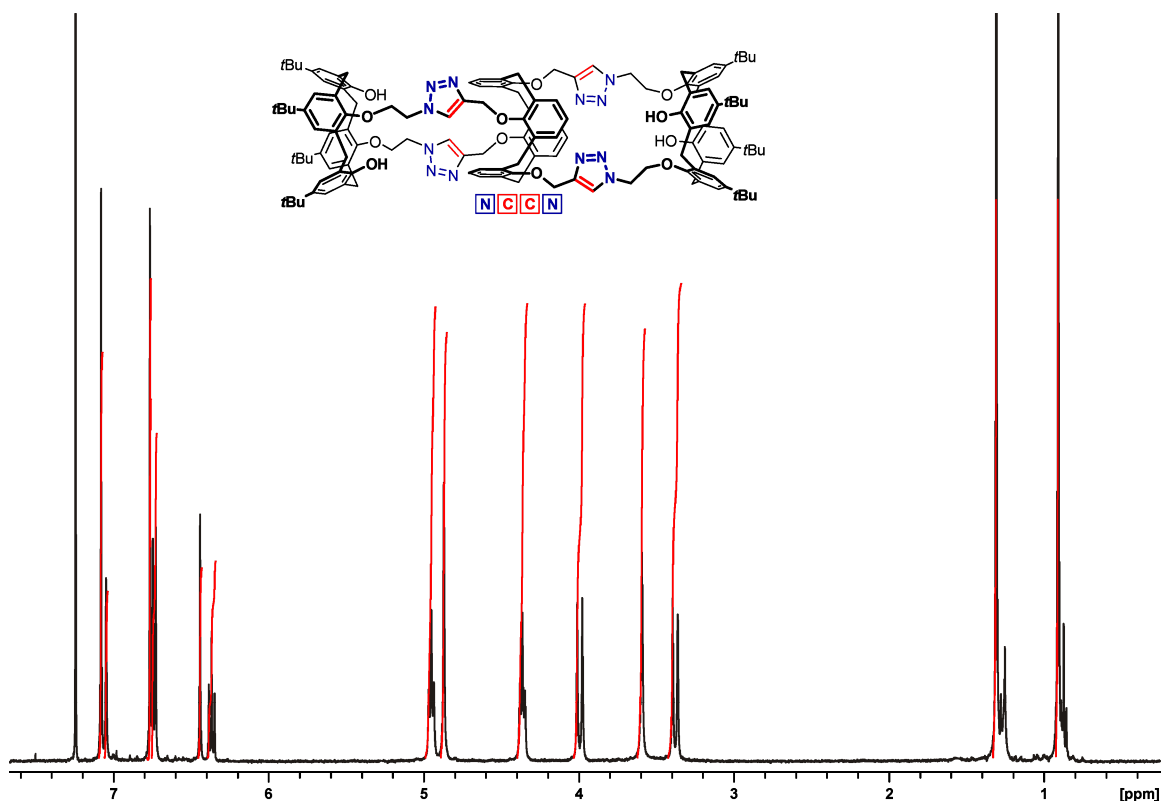

**Figure S7.**  $^1\text{H}$  NMR spectrum of tris(calix[4]arene) **14** (400 MHz,  $\text{CDCl}_3$ ).

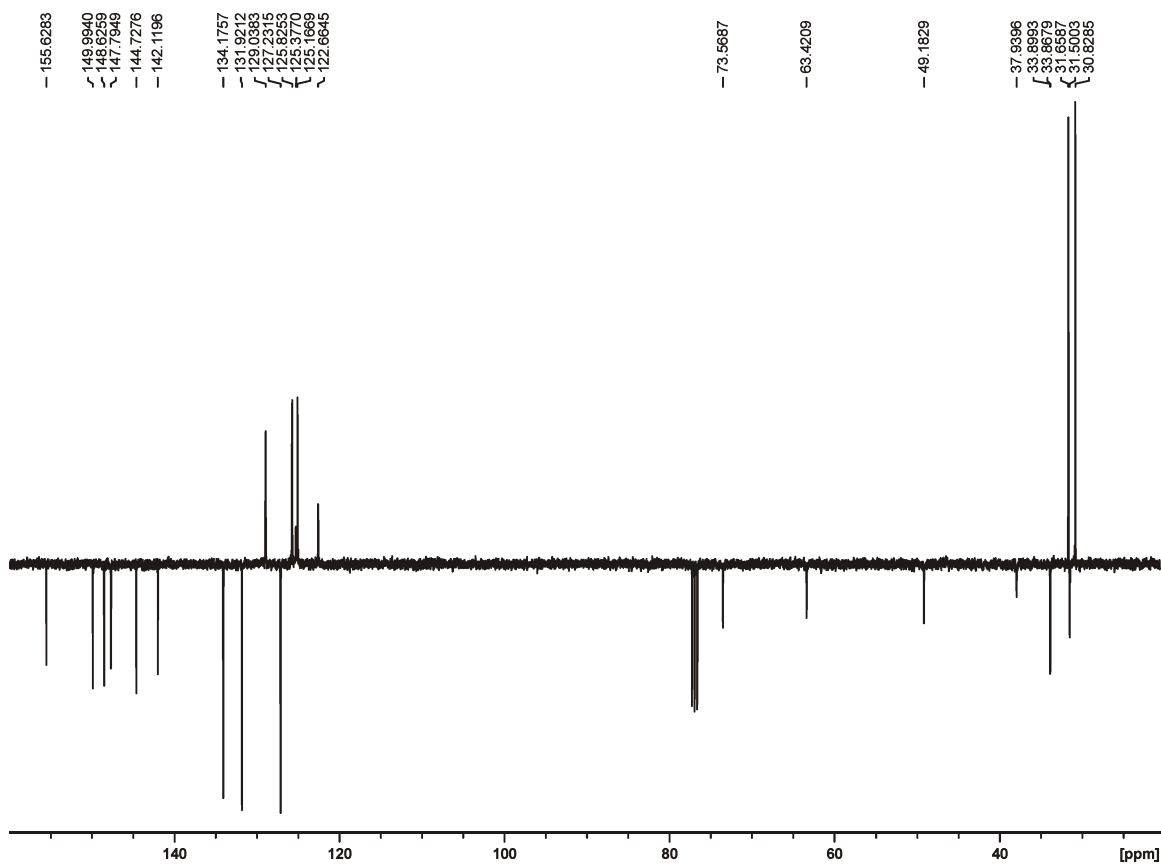

**Figure S8.**  $^{13}\text{C}$  NMR spectrum (APT) of tris(calix[4]arene) **14** (100 MHz,  $\text{CDCl}_3$ ).

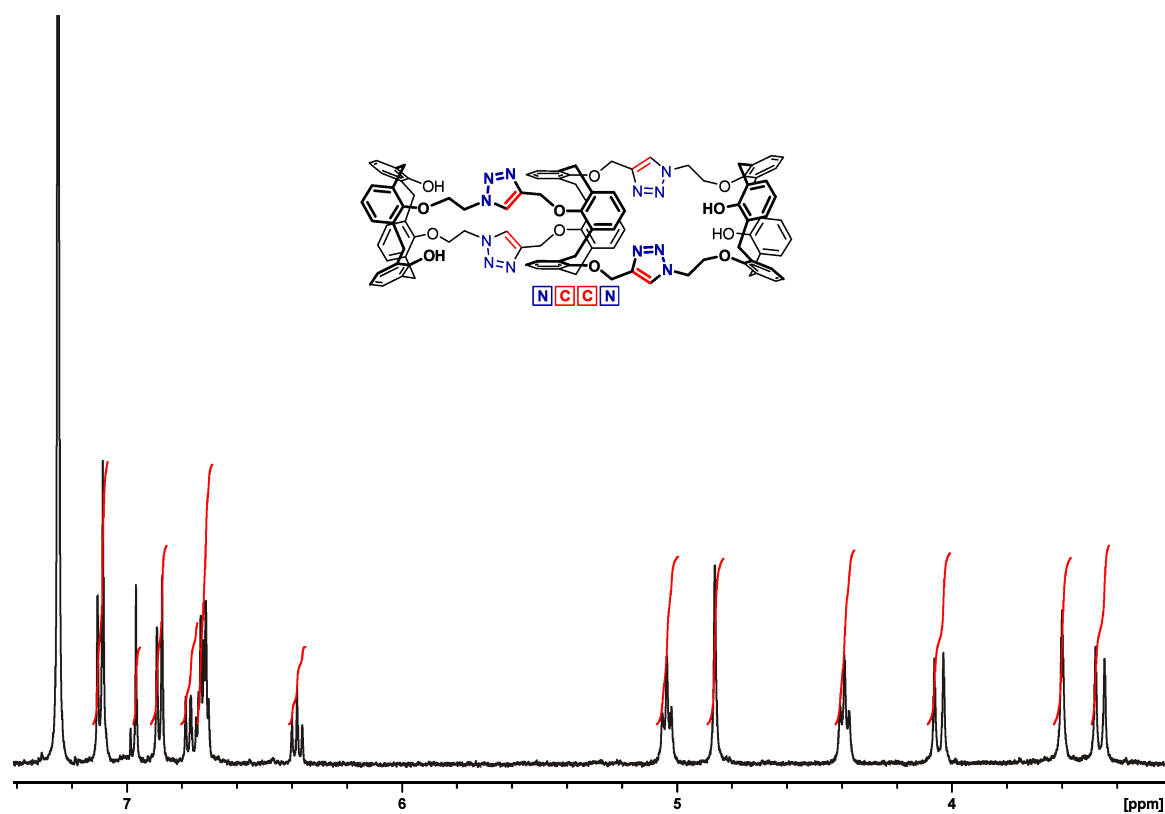

**Figure S9.**  $^1\text{H}$  NMR spectrum of tris(calix[4]arene) **15** (400 MHz,  $\text{CDCl}_3$ ).

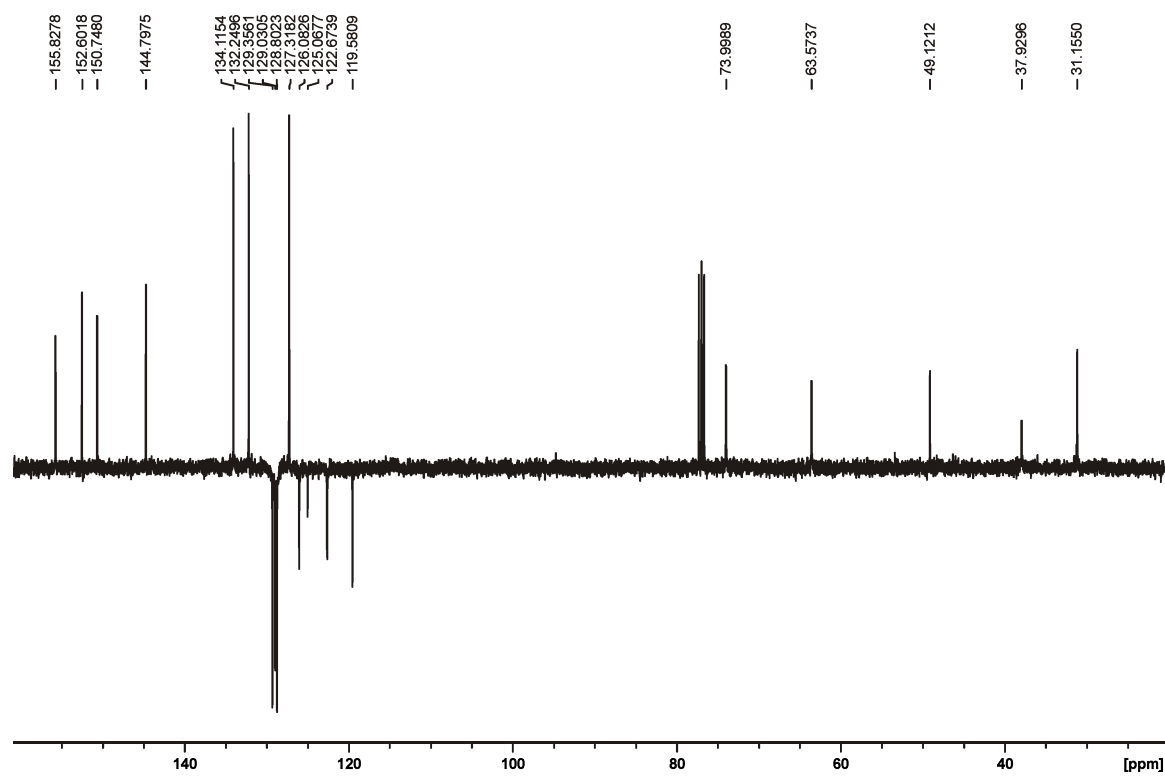

**Figure S10.**  $^{13}\text{C}$  NMR spectrum (APT) of tris(calix[4]arene) **15** (100 MHz,  $\text{CDCl}_3$ ).

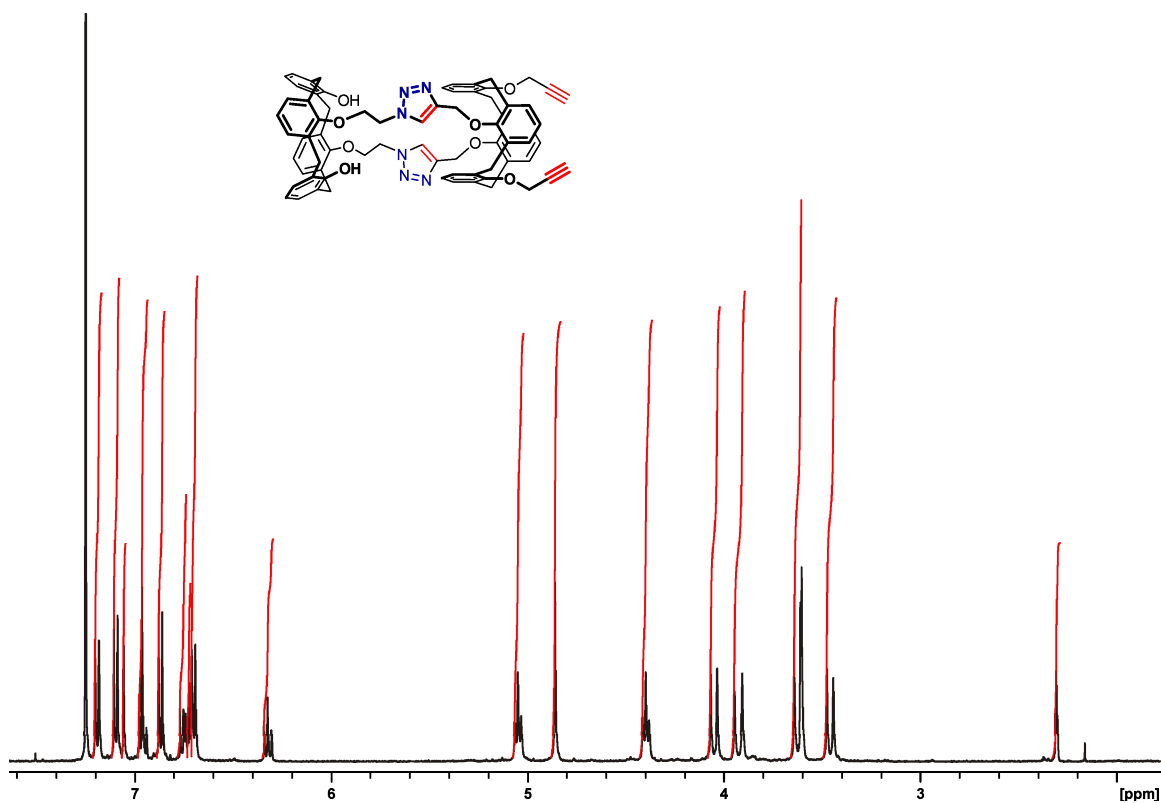

**Figure S11.**  $^1\text{H}$  NMR spectrum of bis(calix[4]arene) **16** (400 MHz,  $\text{CDCl}_3$ ).

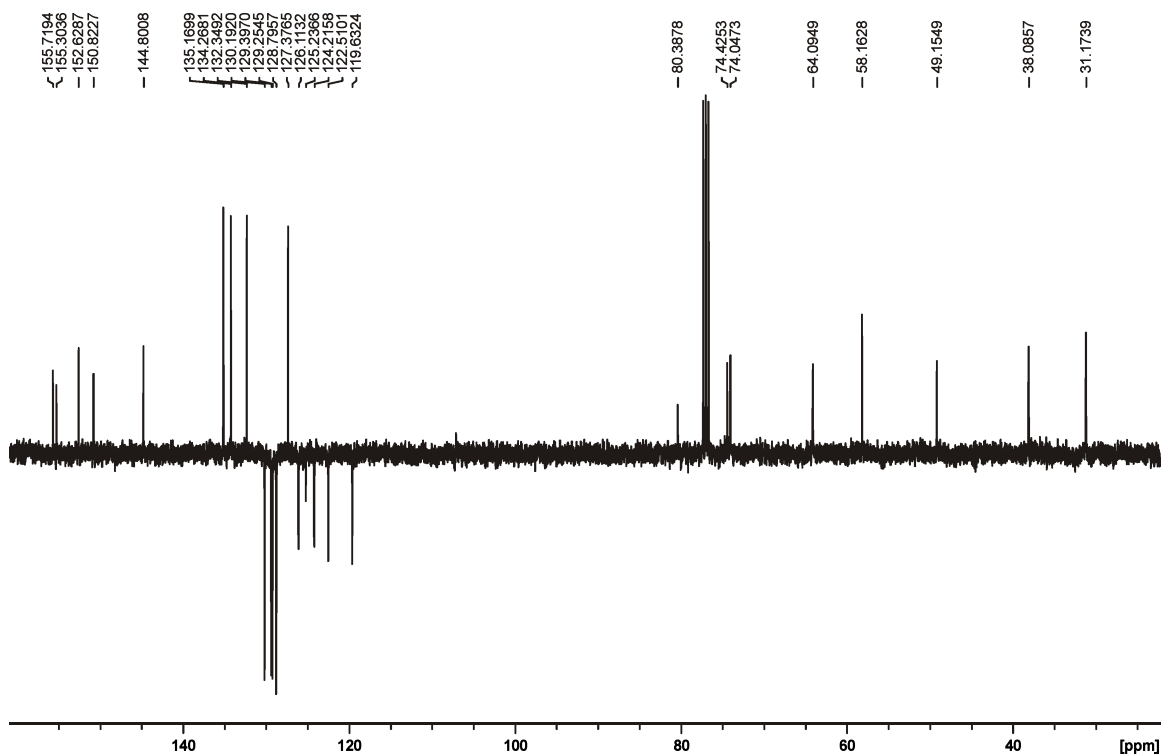

**Figure S12.**  $^{13}\text{C}$  NMR spectrum (APT) of bis(calix[4]arene) **16** (100 MHz,  $\text{CDCl}_3$ ).

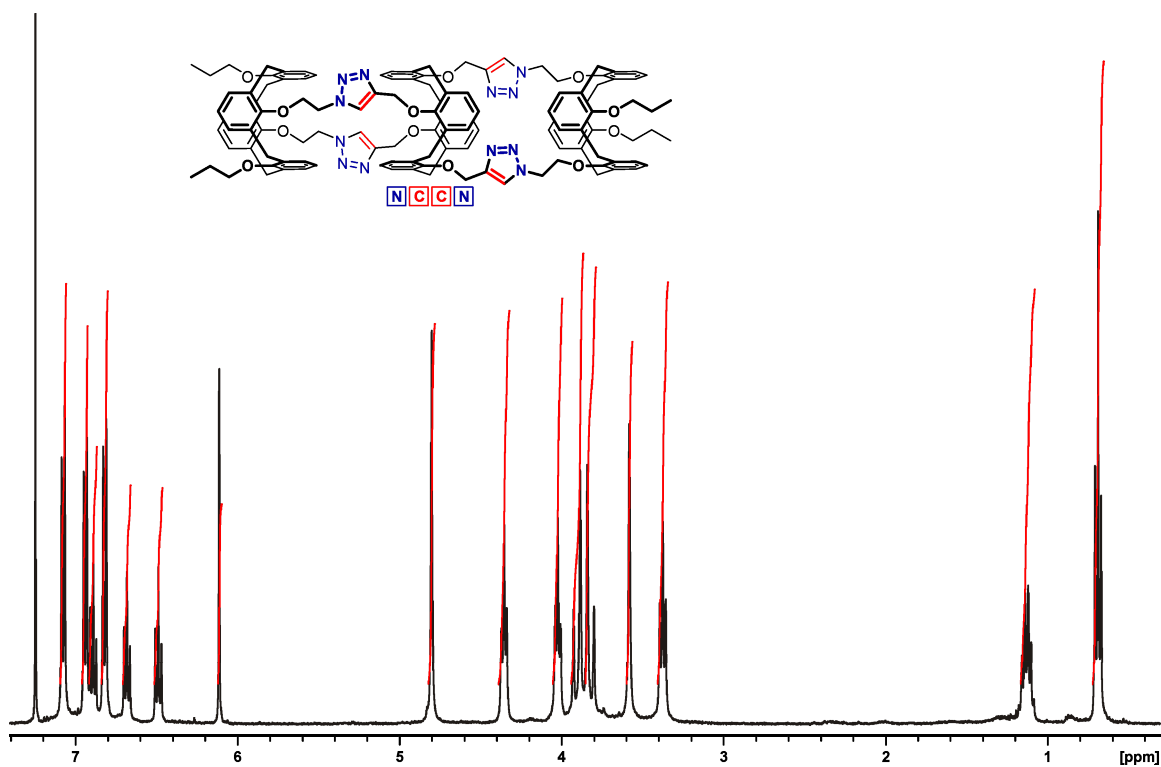

**Figure S13.** <sup>1</sup>H NMR spectrum of tris(calix[4]arene) **17** (400 MHz, CDCl<sub>3</sub>).

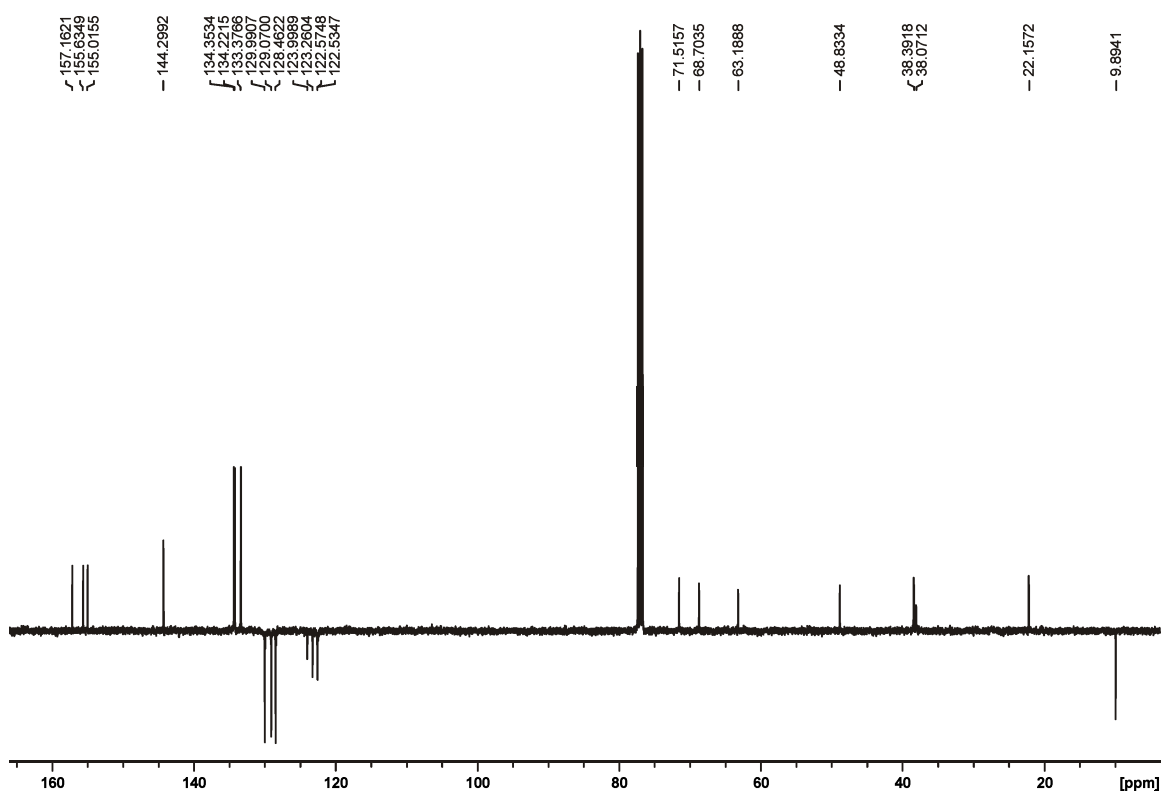

**Figure S14.** <sup>13</sup>C NMR spectrum (APT) of tris(calix[4]arene) **17** (100 MHz, CDCl<sub>3</sub>).

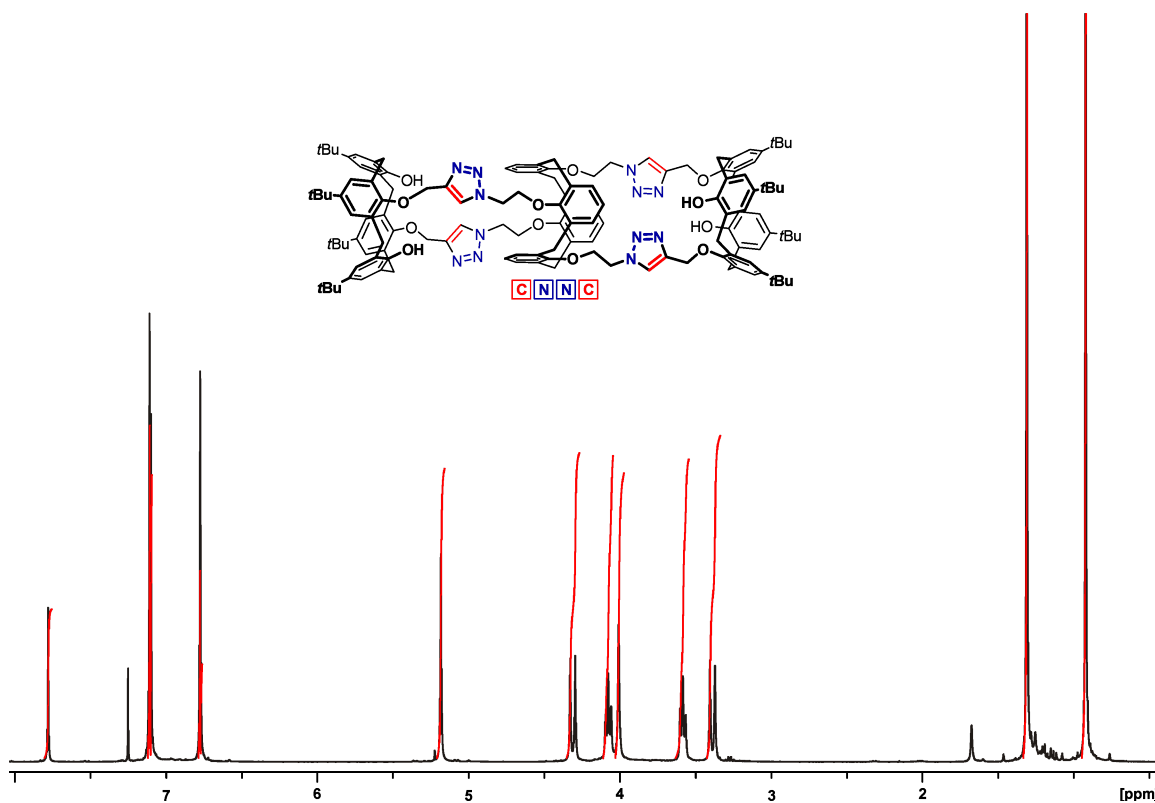

**Figure S15.**  $^1\text{H}$  NMR spectrum of tris(calix[4]arene) **18** (400 MHz,  $\text{CDCl}_3$ ).

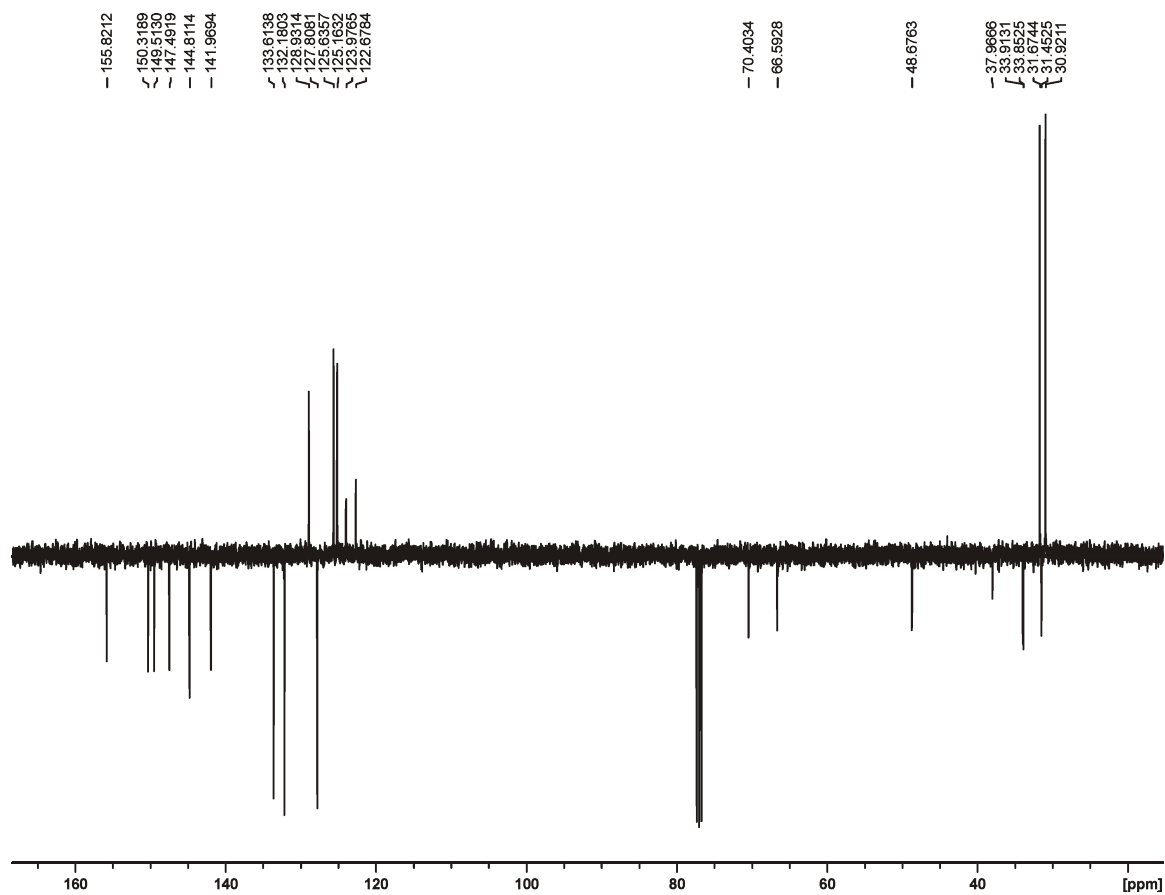

**Figure S16.**  $^{13}\text{C}$  NMR spectrum (APT) of tris(calix[4]arene) **18** (100 MHz,  $\text{CDCl}_3$ ).

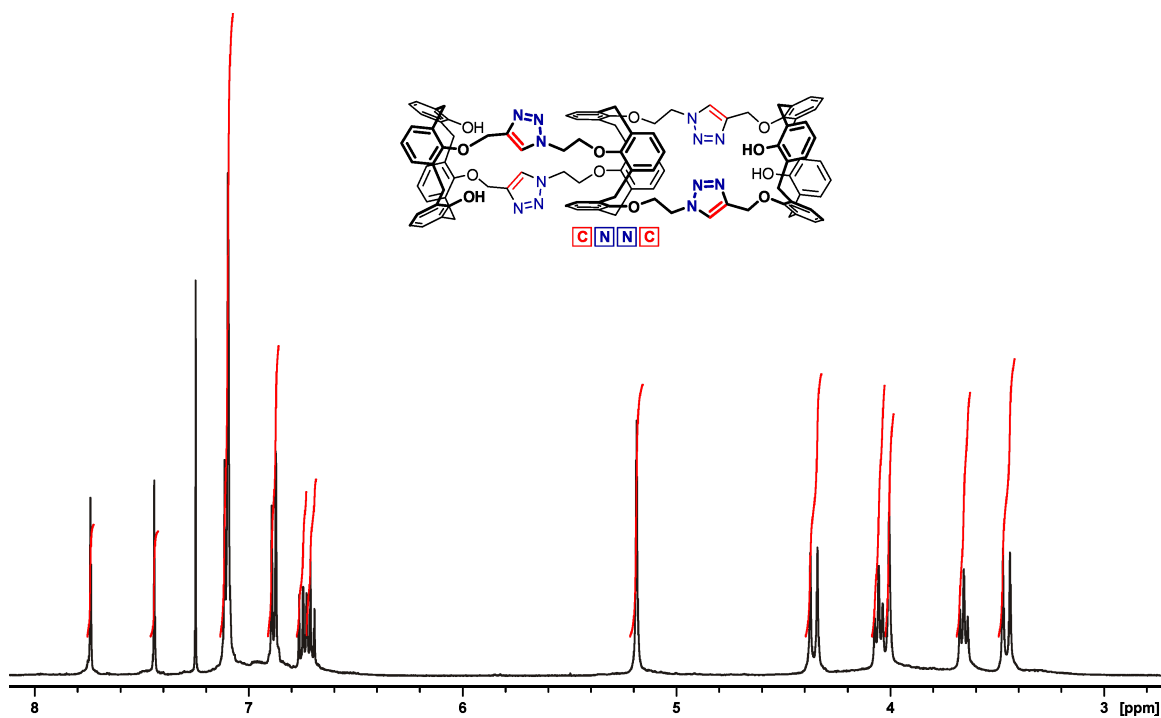

**Figure S17.** <sup>1</sup>H NMR spectrum of tris(calix[4]arene) **19** (400 MHz, CDCl<sub>3</sub>).

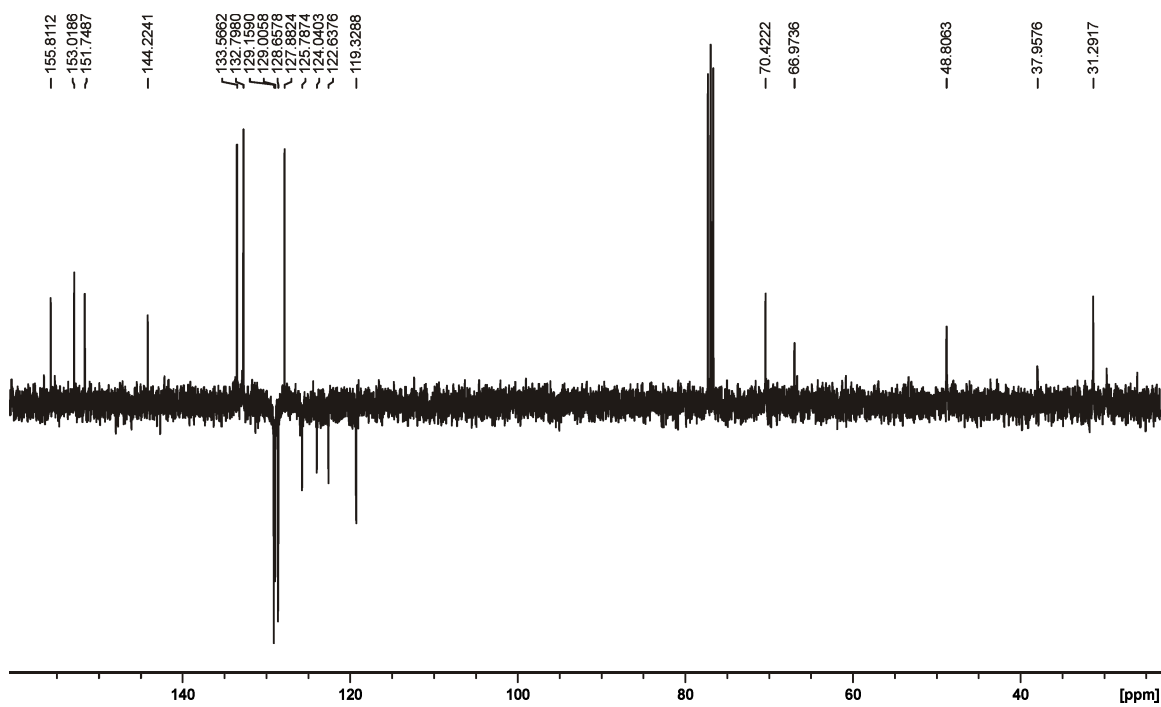

**Figure S18.** <sup>13</sup>C NMR spectrum (APT) of tris(calix[4]arene) **19** (100 MHz, CDCl<sub>3</sub>).

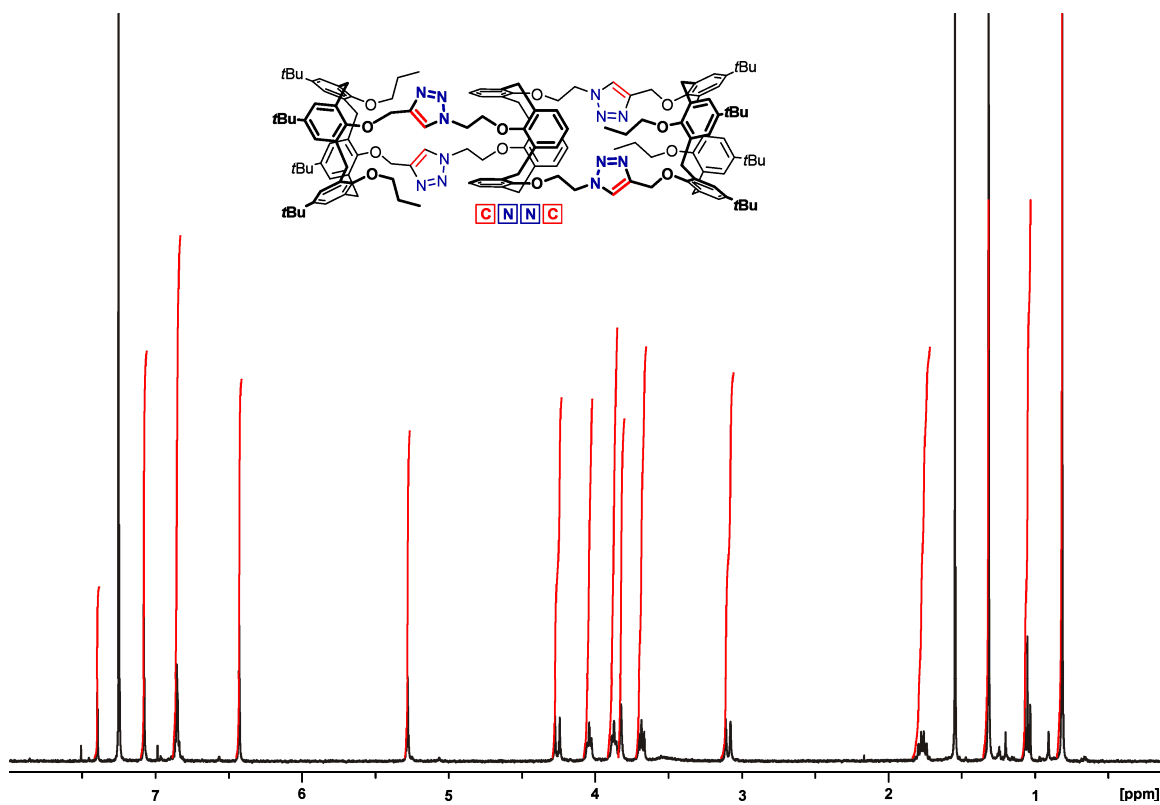

**Figure S19.**  $^1\text{H}$  NMR spectrum of tris(calix[4]arene) **20** (400 MHz,  $\text{CDCl}_3$ ).

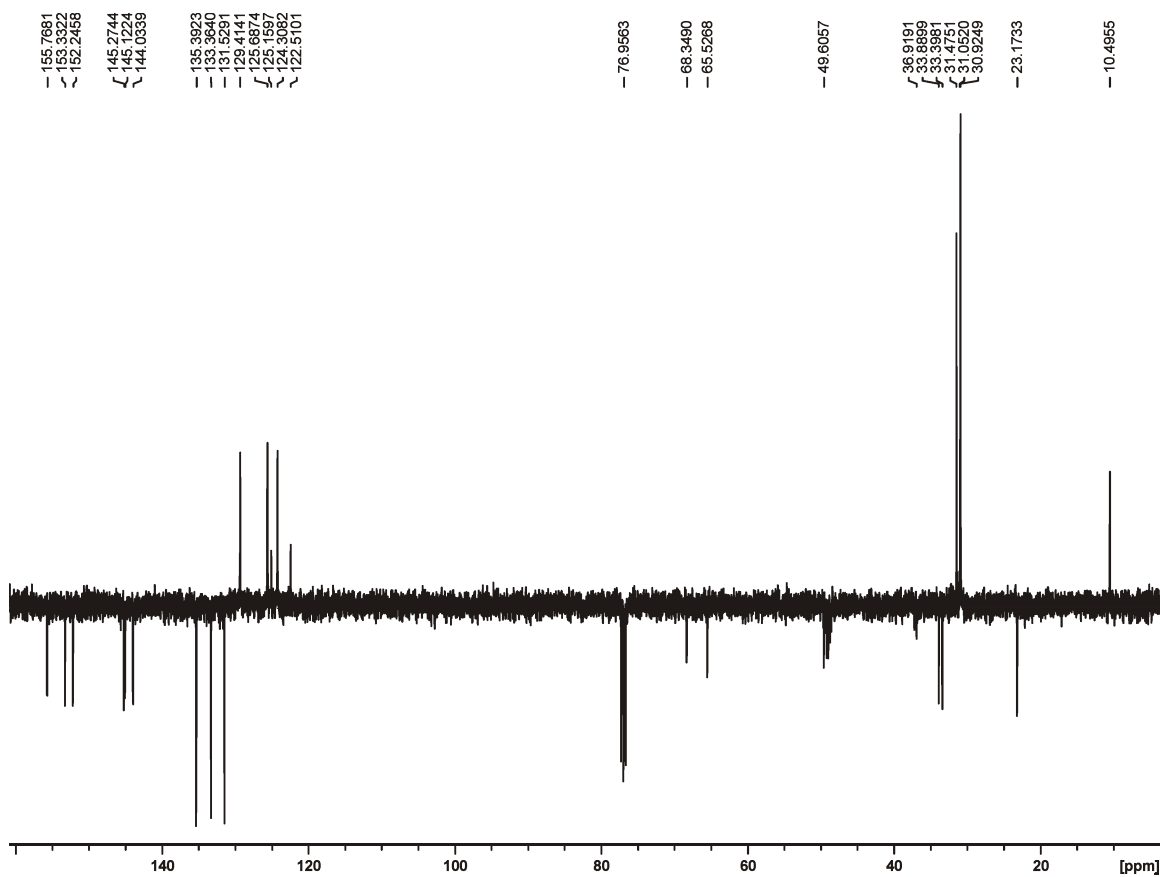

**Figure S20.**  $^{13}\text{C}$  NMR spectrum (APT) of tris(calix[4]arene) **20** (100 MHz,  $\text{CDCl}_3+\text{CD}_3\text{OD}$ ).

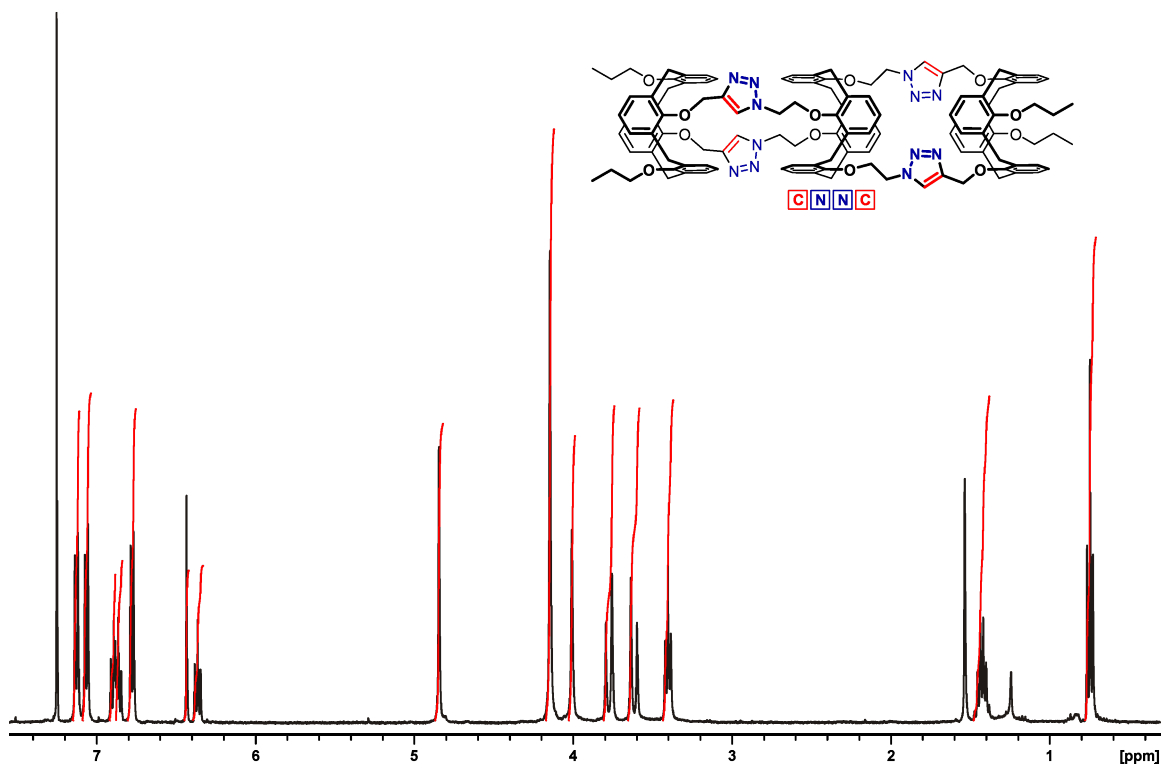

**Figure S21.**  $^1\text{H}$  NMR spectrum of tris(calix[4]arene) **21** (400 MHz,  $\text{CDCl}_3$ ).

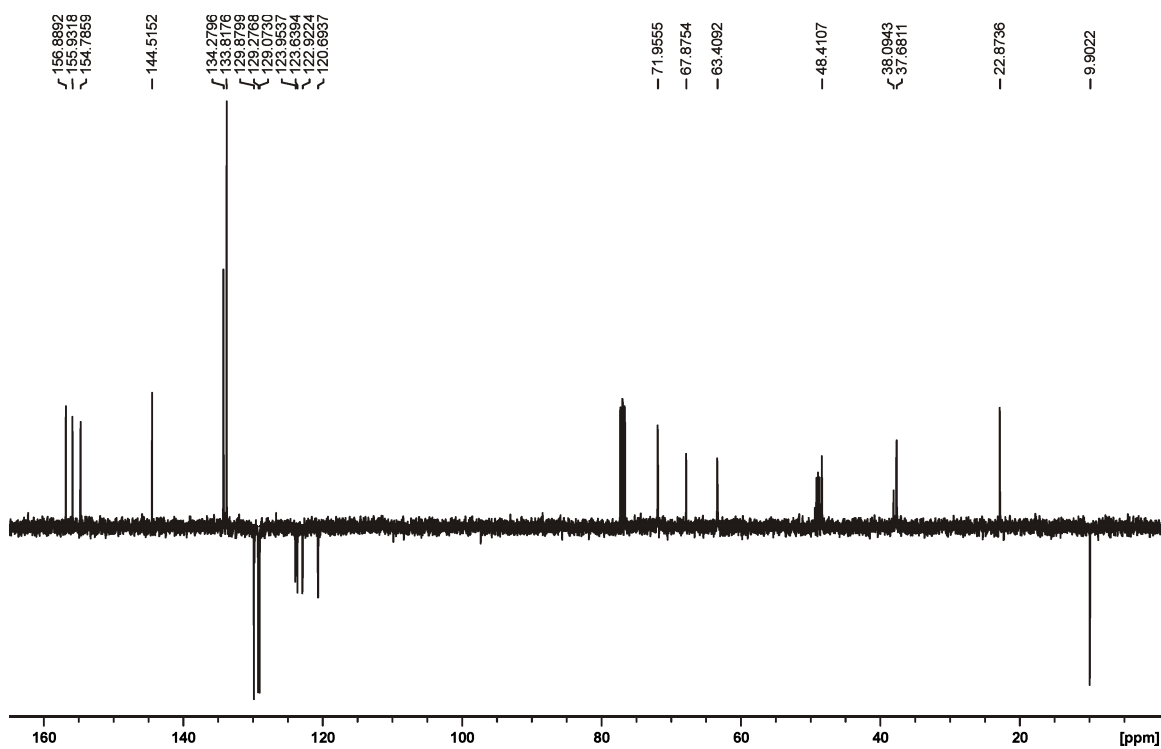

**Figure S22.**  $^{13}\text{C}$  NMR spectrum (APT) of tris(calix[4]arene) **21** (100 MHz,  $\text{CDCl}_3+\text{CD}_3\text{OD}$ ).



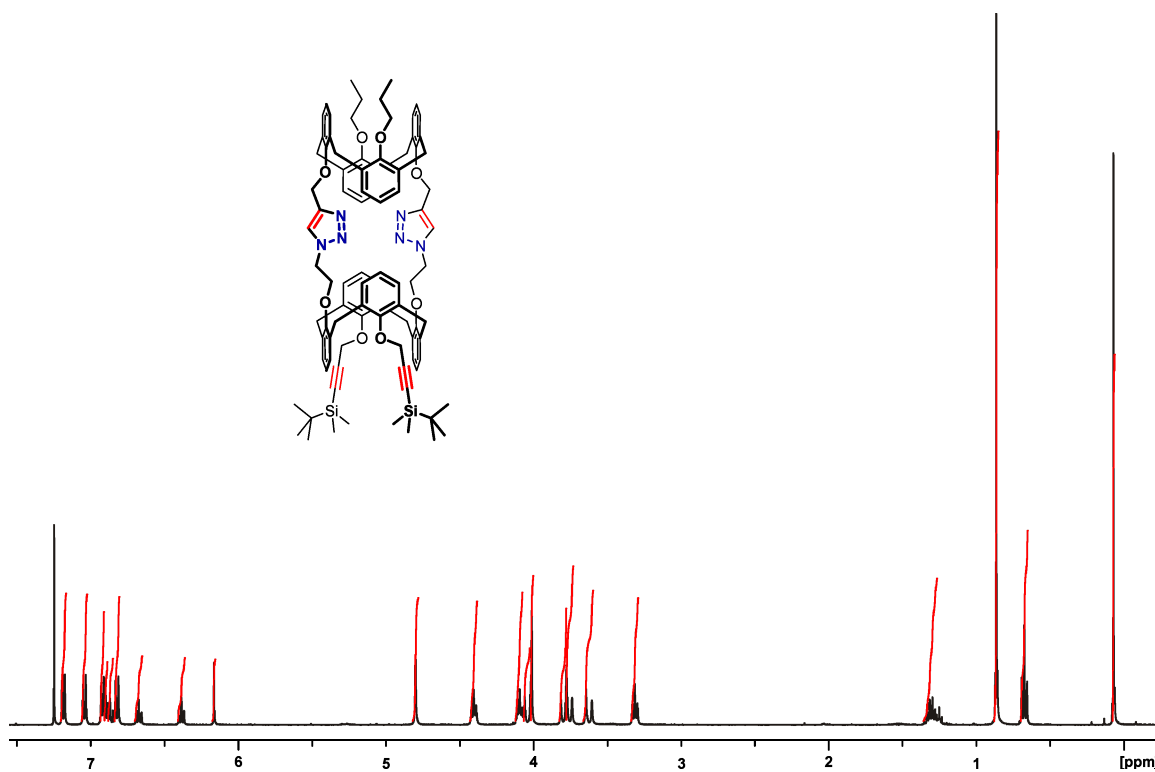

**Figure S23.**  $^1\text{H}$  NMR spectrum of bis(calix[4]arene) **22** (400 MHz,  $\text{CDCl}_3$ ).

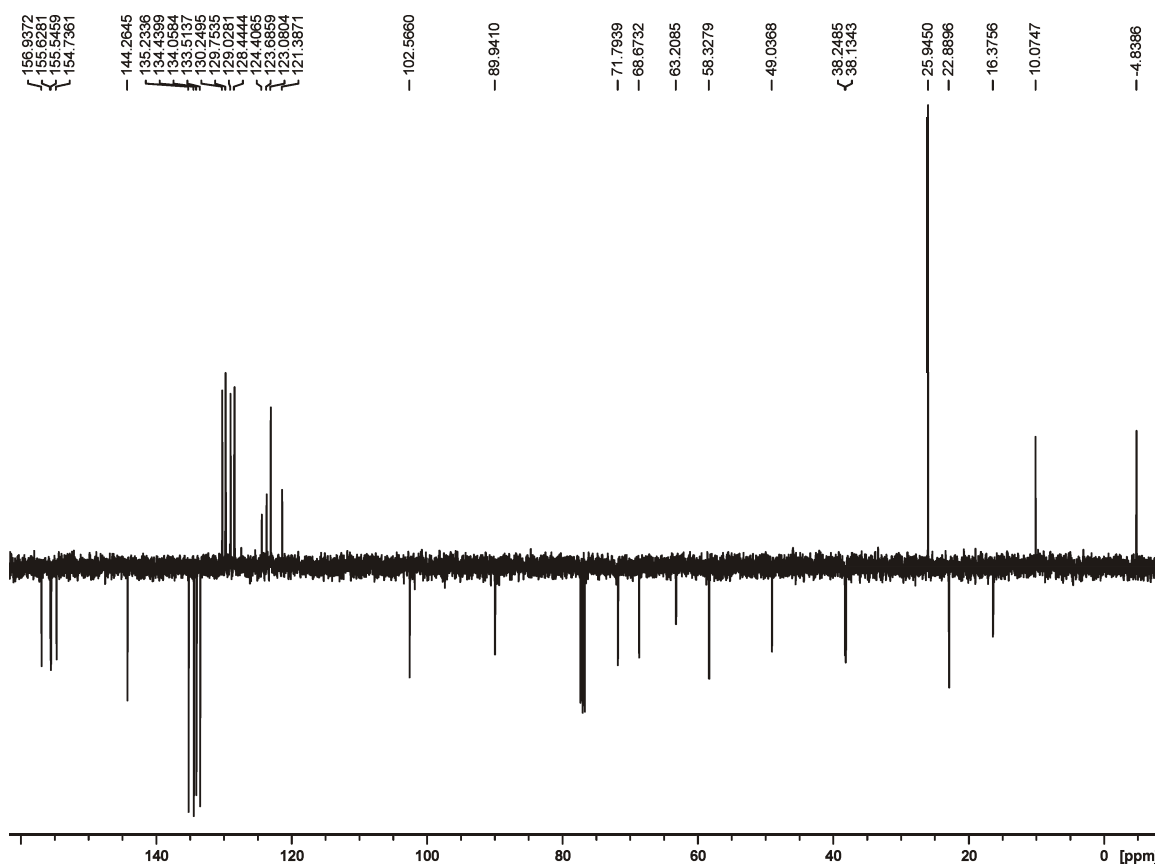

**Figure S24.**  $^{13}\text{C}$  NMR spectrum (APT) of bis(calix[4]arene) **22** (100 MHz,  $\text{CDCl}_3$ ).

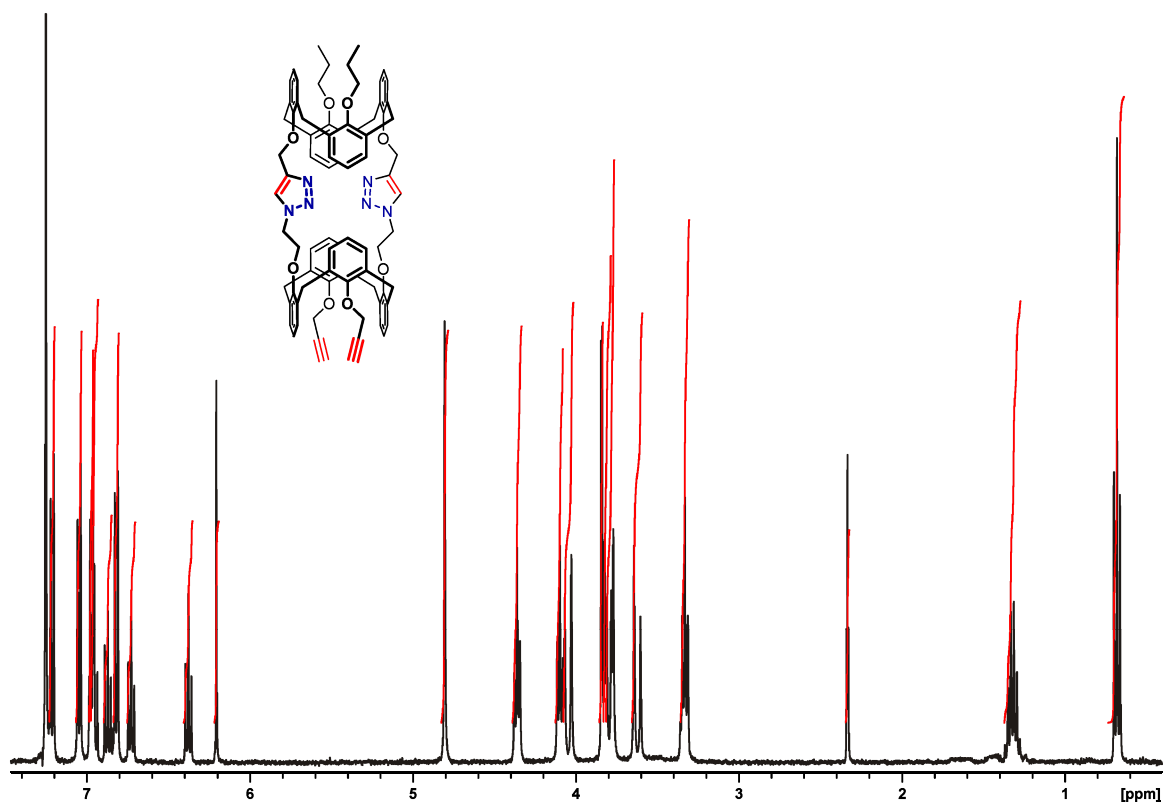

**Figure S25.**  $^1\text{H}$  NMR spectrum of bis(calix[4]arene) **23** (400 MHz,  $\text{CDCl}_3$ ).

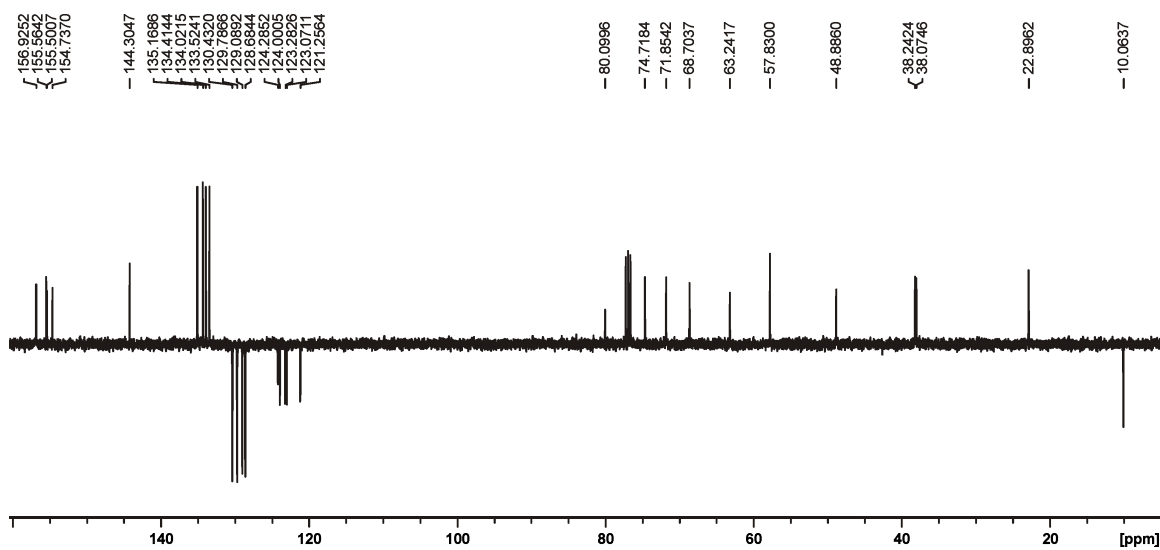

**Figure S26.**  $^{13}\text{C}$  NMR spectrum (APT) of bis(calix[4]arene) **23** (100 MHz,  $\text{CDCl}_3$ ).

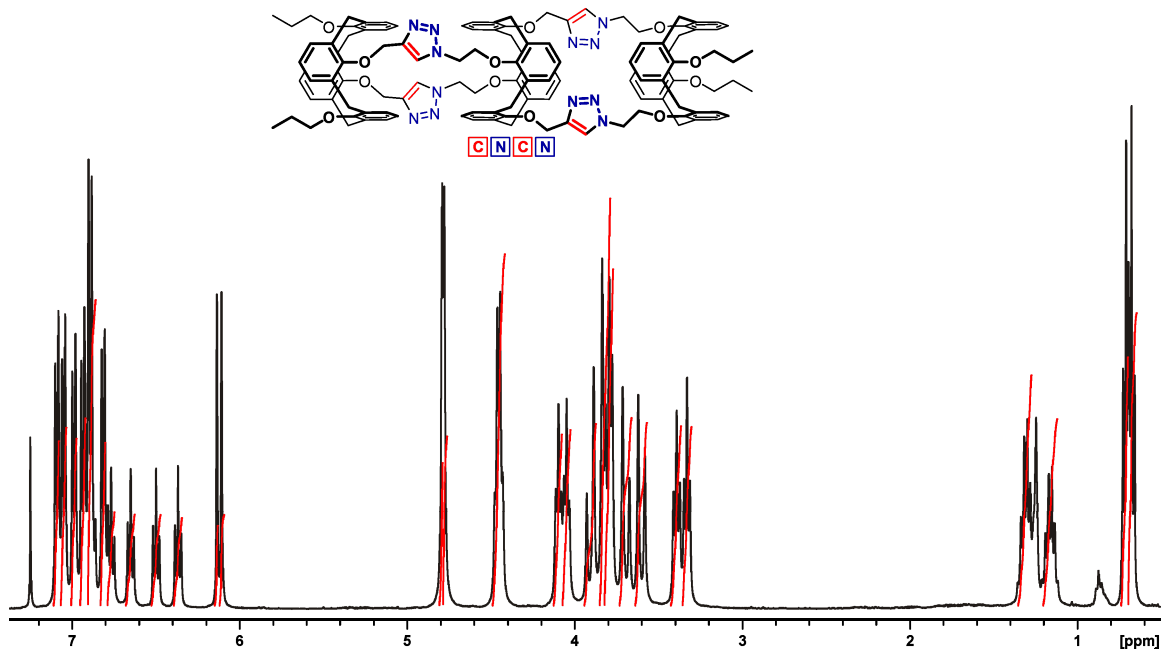

**Figure S27.**  $^1\text{H}$  NMR spectrum of tris(calix[4]arene) **24** (400 MHz,  $\text{CDCl}_3$ ).

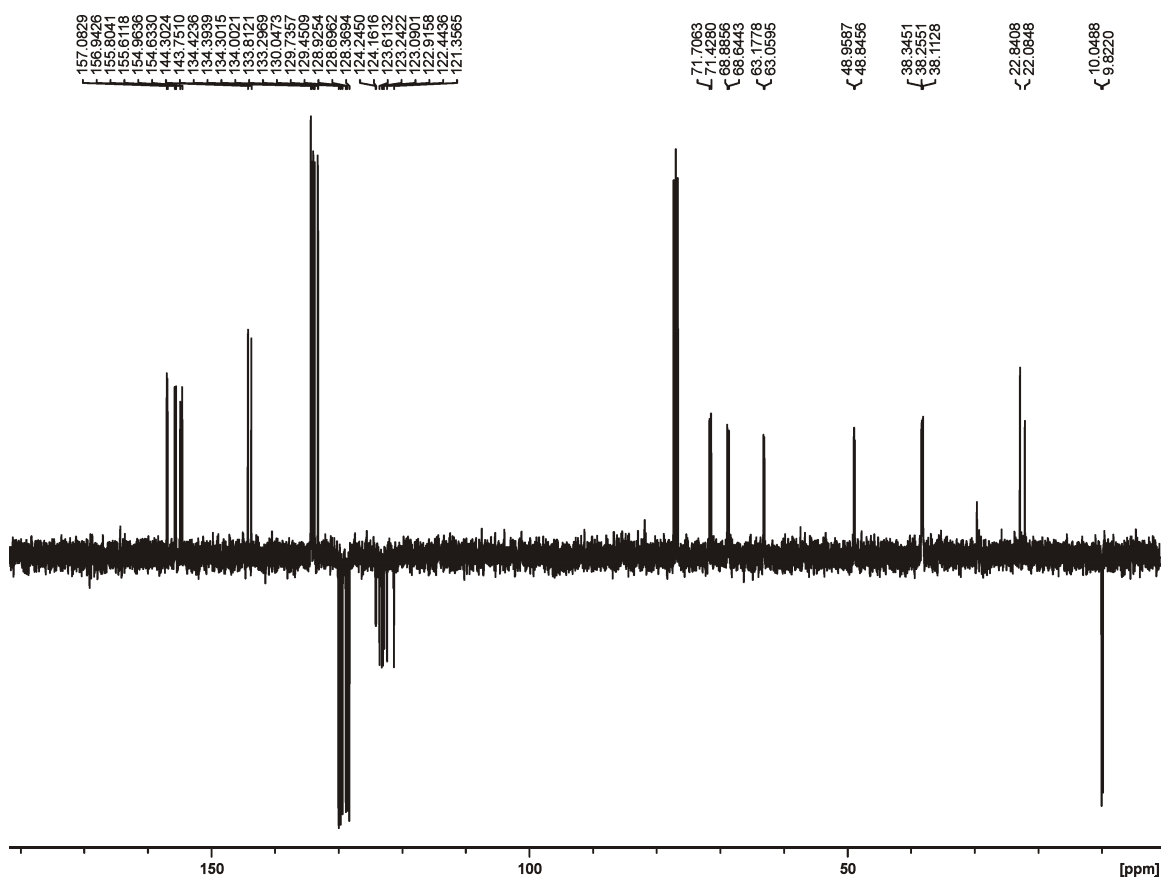

**Figure S28.**  $^{13}\text{C}$  NMR spectrum (APT) of tris(calix[4]arene) **24** (100 MHz,  $\text{CDCl}_3$ ).

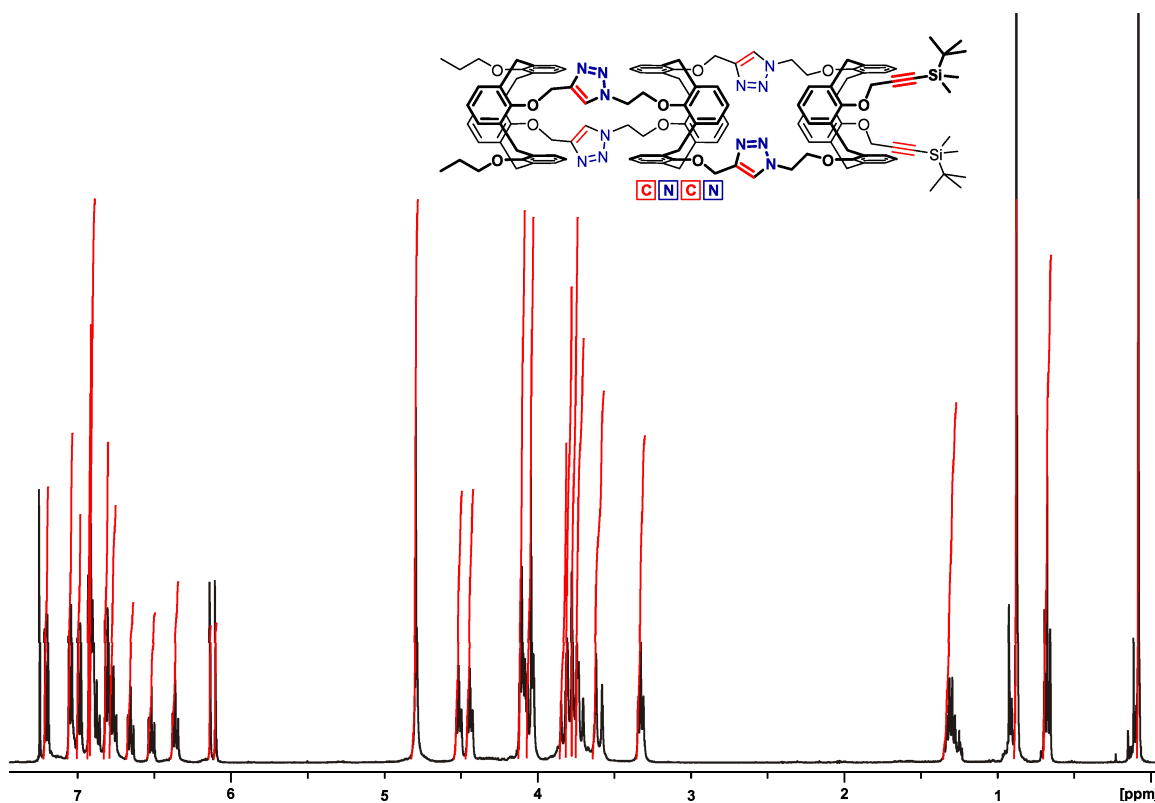

Figure S29.  $^1\text{H}$  NMR spectrum of tris(calix[4]arene) **25** (400 MHz,  $\text{CDCl}_3$ ).

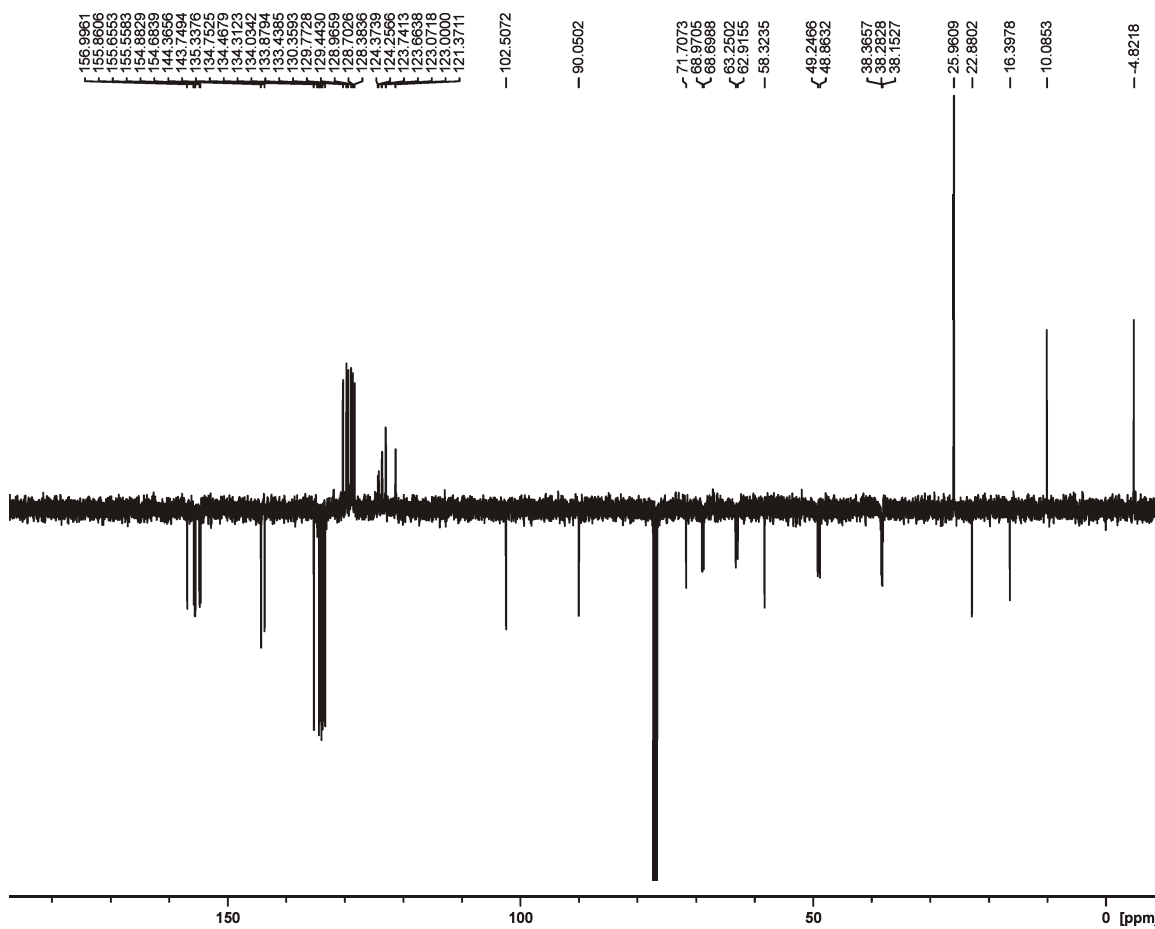

Figure S30.  $^{13}\text{C}$  NMR spectrum (APT) of tris(calix[4]arene) **25** (100 MHz,  $\text{CDCl}_3$ ).

## Details of X-ray diffraction measurements

Crystallographic data were collected at 150 K on a Bruker SMART APEX II diffractometer equipped with a PHOTON II CMOS detector using graphite monochromatized Mo-K $\alpha$  radiation ( $\lambda = 0.71073 \text{ \AA}$ ) using a  $\omega$ -scan mode. Absorption correction based on measurements of equivalent reflections was applied.<sup>[S8]</sup> The structure was solved by direct methods and refined by full matrix least-squares on  $F^2$  with anisotropic thermal parameters for all non-hydrogen atoms using Olex2 package.<sup>[S9]</sup> Hydrogen atoms were placed in calculated positions and refined using a riding model. Crystallographic details are presented in Table S6. CCDC 2157422 contains the supplementary crystallographic data for the structure. These data can be obtained free of charge from The Cambridge Crystallographic Data Centre via [www.ccdc.cam.ac.uk/data\\_request/cif](http://www.ccdc.cam.ac.uk/data_request/cif).

Table S6. Details of the X-ray crystal data collection and structure refinement for compound **14**

|                                             |                                                                                                                               |
|---------------------------------------------|-------------------------------------------------------------------------------------------------------------------------------|
| Empirical formula                           | C <sub>136</sub> H <sub>156</sub> N <sub>12</sub> O <sub>12</sub> ·1.75CH <sub>3</sub> OH·3.44CH <sub>2</sub> Cl <sub>2</sub> |
| M <sub>w</sub>                              | 2489.94                                                                                                                       |
| Temperature (K)                             | 150(2)                                                                                                                        |
| Size (mm)                                   | 0.35 × 0.28 × 0.17                                                                                                            |
| Cryst. system                               | triclinic                                                                                                                     |
| Space group                                 | P-1                                                                                                                           |
| <i>a</i> (Å)                                | 12.9900(8)                                                                                                                    |
| <i>b</i> (Å)                                | 23.3144(17)                                                                                                                   |
| <i>c</i> (Å)                                | 24.9990(15)                                                                                                                   |
| $\alpha$ (deg)                              | 94.717(3)                                                                                                                     |
| $\beta$ (deg)                               | 99.611(2)                                                                                                                     |
| $\gamma$ (deg)                              | 101.122(2)                                                                                                                    |
| <i>V</i> (Å <sup>3</sup> )                  | 7273.2(8)                                                                                                                     |
| <i>Z</i>                                    | 2                                                                                                                             |
| $\rho_{\text{calcd}}$ (g·cm <sup>-3</sup> ) | 1.141                                                                                                                         |
| Abs coeff (mm <sup>-1</sup> )               | 0.195                                                                                                                         |
| <i>F</i> (000)                              | 2656                                                                                                                          |
| $\theta$ range (deg)                        | 1.63 < $\theta$ < 25.03                                                                                                       |
| no. of collected/unique rflns               | 90200 / 25299                                                                                                                 |
| Completeness to $\theta$ (%)                | 98.5                                                                                                                          |
| no. of data/restraints/params               | 25299/167/1564                                                                                                                |
| Goodness of fit on $F^2$                    | 1.569                                                                                                                         |
| Final <i>R</i> indices ( $I > 2\sigma(I)$ ) | R1 = 0.1466, wR2 = 0.4014                                                                                                     |
| <i>R</i> indices (all data)                 | R1 = 0.2255, wR2 = 0.4423                                                                                                     |
| Largest diff peak/hole (e/Å <sup>3</sup> )  | 2.83 / -1.08                                                                                                                  |

## References

- S1. Z.-G. Luo, Y. Zhao, F. Xu, C. Ma, X.-M. Xu and X.-M. Zhang, Synthesis and thermal properties of novel calix[4]arene derivatives containing 1,2,3-triazole moiety *via* K<sub>2</sub>CO<sub>3</sub>-catalyzed 1,3-dipolar cycloaddition reaction, *Chinese Chem. Lett.*, 2014, **25**, 1346–1348.
- S2. A. Gorbunov, N. Ozerov, M. Malakhova, A. Eshtukov, D. Cheshkov, S. Bezzubov, V. Kovalev and I. Vatsouro, Assembling triazolated calix[4]semitubes by means of copper(I)-catalyzed azide–alkyne cycloaddition, *Org. Chem. Front.*, 2021, **8**, 3853–3866.
- S3. Z. Asfari, A. Bilyk, C. Bond, J. M. Harrowfield, G. A. Koutsantonis, N. Lengkeek, M. Mocerino, B. W. Skelton, A. N. Sobolev, S. Strano, J. Vicens and A. H. White, Factors influencing solvent adduct formation by calixarenes in the solid state, *Org. Biomol. Chem.*, 2004, **2**, 387–396.
- S4. W. Xu, J. J. Vittal and R. J. Puddephatt, Propargyl calix[4]arenes and their complexes with silver(I) and gold(I), *Can. J. Chem.*, 1996, **74**, 766–774.
- S5. S. Cecioni, R. Lalor, B. Blanchard, J.-P. Praly, A. Imbert, S. E. Matthews and S. Vidal, Achieving high affinity towards a bacterial lectin through multivalent topological isomers of calix[4]arene glycoconjugates, *Chem. – Eur. J.*, 2009, **15**, 13232–13240.
- S6. V. A. Burirov, N. A. Epifanova, E. V. Popova, S. F. Vasilevsky, S. E. Solovieva, I. S. Antipin and A. I. Konovalov, Regioselective synthesis of 1,2,3-triazolyl derivatives of calix[4]arenes based on 1,3-dipolar cycloaddition, *Russ. Chem. Bull.*, 2013, **62**, 767–772.
- S7. V. G. Organo, A. V. Leontiev, V. Sgarlata, H. V. R. Dias and D. M. Rudkevich, Supramolecular features of calixarene-based synthetic nanotubes, *Angew. Chem. Int. Ed.*, 2005, **44**, 3043–3047.
- S8. G. M. Sheldrick, A short history of SHELX, *Acta Crystallogr.*, 2008, **A64**, 112–122.
- S9. O. V. Dolomanov, L. J. Bourhis, R. J. Gildea, J. A. K. Howard and H. Puschmann, OLEX2: a complete structure solution, refinement and analysis program, *J. Appl. Cryst.*, 2009, **42**, 339–341.
